# Supplementary material for: Development and validation of random-forest based federated learning algorithms for delirium prediction using electronic medical records from eleven hospitals in Austria: a retrospective study
Source: Research Square preprint supplement (doi:10.21203/rs.3.rs-2970317/v1), 2024-04-16
Supplement: Supplementary file 1 [file dda40c9421ee4eb7cec25a40.docx]

Supplementary material

# Description

This supplementary material consist of the tables and figures that provide the reader with additional information about the performance of each hospital model on different test datasets.

Supplementary table 1 presents the mean accuracy, sensitivity, specificity, precision and F1 score over five folds metrics when tested with combined test dataset at the optimum threshold selected at Youden index. Additionally, we have added the or_mean and or_median that represent mean and median after removing outliers. Further, we have added majority and negative class weighted average results as well.

Supplementary figure S1 – S11 show the box plots that represent the performance of the models when tested with individual hospitals’ test data.

In the end, a heatmap is attached as supplemenetary figure 12 that shows an overview of the perfromance measure AUROC with 95% CI obtained from testing the each hospital model, general model and FL schemes along with mean and median after removing the outliers from prediction probabilties and two more FL sechemes, i.e weighted average based on majority and negative samples with each hospital test data and combined test data.

| Model | Accuracy | Sensitivity | Specificity | Precision | F1 |
| --- | --- | --- | --- | --- | --- |
| H01 | 0.711 (0.02) | 0.78 (0.011) | 0.681 (0.033) | 0.515 (0.024) | 0.62 (0.014) |
| H02 | 0.672 (0.013) | 0.721 (0.021) | 0.65 (0.012) | 0.471 (0.013) | 0.57 (0.015) |
| H03 | 0.663 (0.017) | 0.678 (0.053) | 0.657 (0.042) | 0.462 (0.017) | 0.548 (0.016) |
| H04 | 0.666 (0.017) | 0.714 (0.042) | 0.645 (0.04) | 0.466 (0.016) | 0.563 (0.008) |
| H05 | 0.662 (0.03) | 0.789 (0.028) | 0.606 (0.054) | 0.466 (0.028) | 0.585 (0.015) |
| H06 | 0.641 (0.012) | 0.755 (0.06) | 0.591 (0.032) | 0.444 (0.011) | 0.559 (0.021) |
| H07 | 0.662 (0.017) | 0.61 (0.106) | 0.685 (0.06) | 0.457 (0.017) | 0.519 (0.043) |
| H08 | 0.674 (0.019) | 0.707 (0.012) | 0.66 (0.028) | 0.474 (0.021) | 0.567 (0.015) |
| H09 | 0.585 (0.034) | 0.787 (0.109) | 0.497 (0.09) | 0.405 (0.017) | 0.532 (0.027) |
| H10 | 0.759 (0.006) | 0.717 (0.02) | 0.778 (0.014) | 0.583 (0.01) | 0.643 (0.006) |
| H11 | 0.593 (0.055) | 0.611 (0.125) | 0.586 (0.133) | 0.396 (0.032) | 0.473 (0.017) |
| GM | 0.772 (0.015) | 0.76 (0.038) | 0.777 (0.036) | 0.598 (0.027) | 0.668 (0.008) |
| mean | 0.702 (0.01) | 0.781 (0.017) | 0.668 (0.015) | 0.504 (0.011) | 0.613 (0.011) |
| median | 0.682 (0.011) | 0.741 (0.019) | 0.656 (0.019) | 0.483 (0.012) | 0.585 (0.01) |
| or_mean | 0.67 (0.013) | 0.764 (0.039) | 0.63 (0.033) | 0.472 (0.012) | 0.583 (0.009) |
| or_median | 0.675 (0.009) | 0.738 (0.017) | 0.648 (0.014) | 0.475 (0.009) | 0.578 (0.009) |
| samples | 0.744 (0.004) | 0.77 (0.025) | 0.733 (0.012) | 0.555 (0.007) | 0.645 (0.008) |
| positives | 0.762 (0.014) | 0.754 (0.027) | 0.765 (0.031) | 0.583 (0.022) | 0.657 (0.006) |
| negatives | 0.718 (0.016) | 0.792 (0.016) | 0.685 (0.03) | 0.522 (0.019) | 0.629 (0.01) |
| minority | 0.764 (0.01) | 0.748 (0.016) | 0.771 (0.02) | 0.586 (0.017) | 0.657 (0.008) |
| majority | 0.728 (0.019) | 0.797 (0.042) | 0.698 (0.043) | 0.535 (0.026) | 0.639 (0.009) |
| mpd | 0.756 (0.006) | 0.765 (0.019) | 0.751 (0.011) | 0.571 (0.009) | 0.654 (0.008) |

supplementary table 1 Mean of accuracy, sensitivity, specificity, precision, and F1 score of all the models tested with the combined test dataset over 5 folds with standard deviation at the optimum threshold selected at Youden index.

# Box Plots


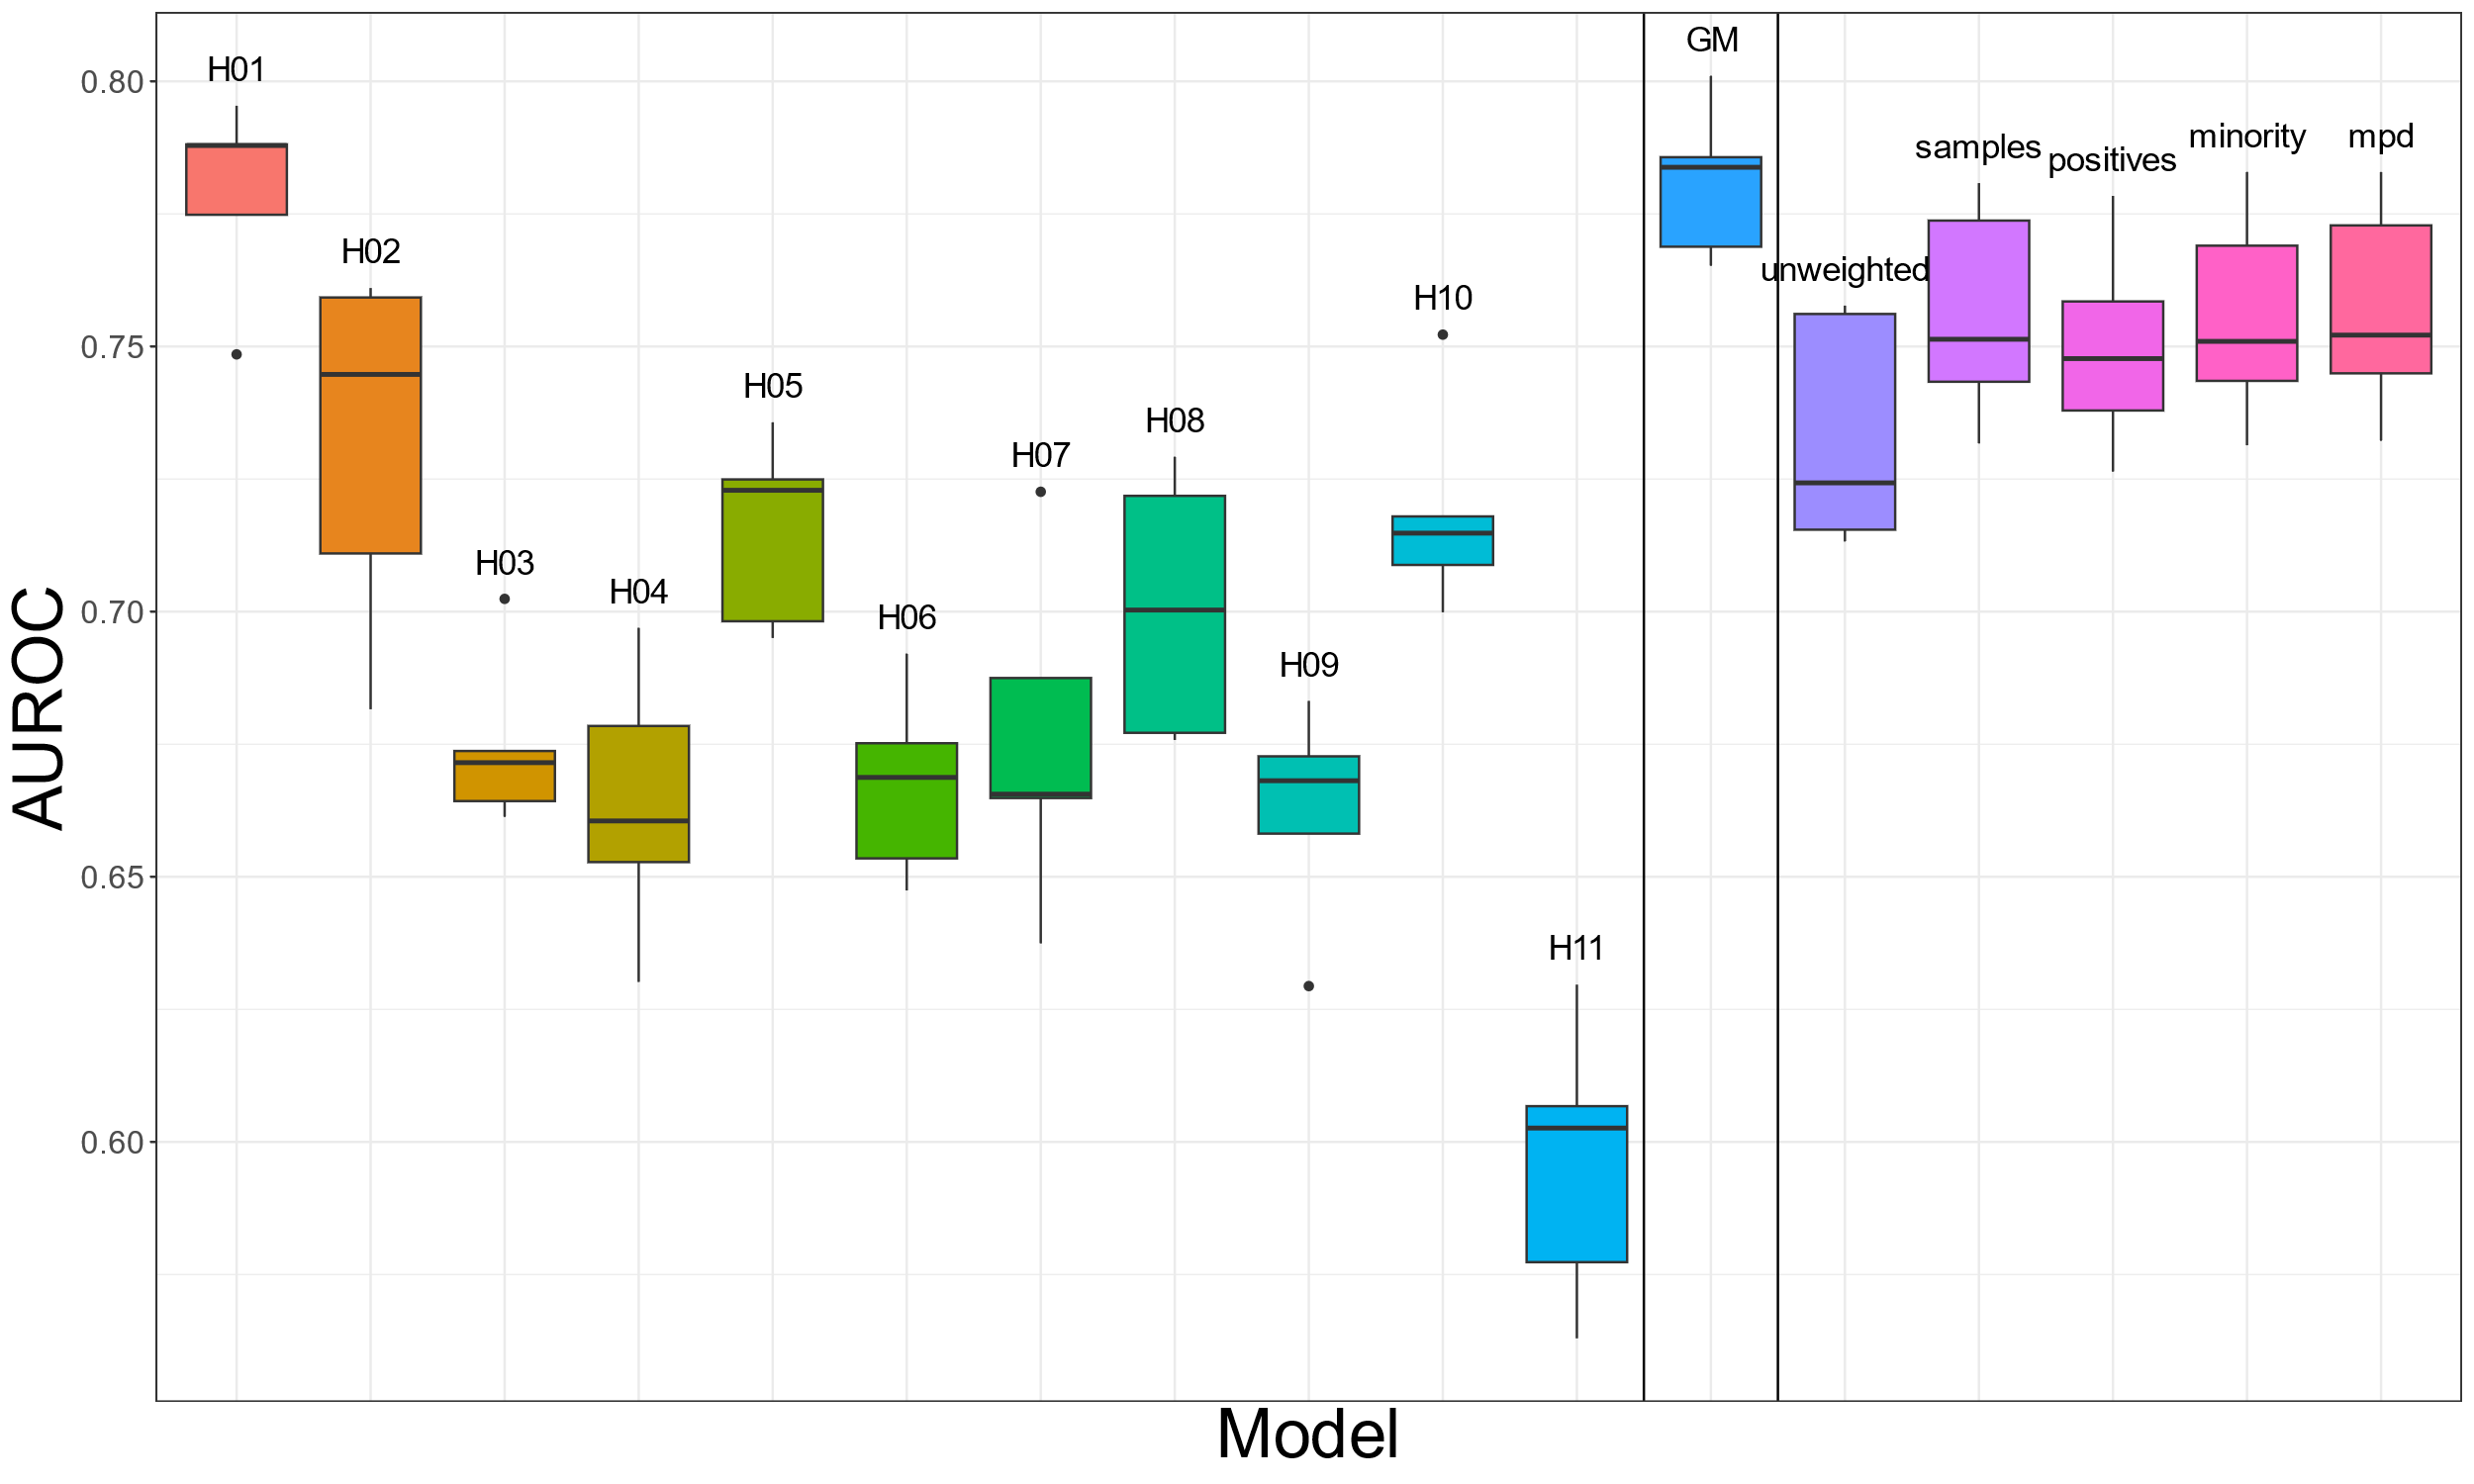


Supplementary figure S1 Models were tested using test data from Hospital H01


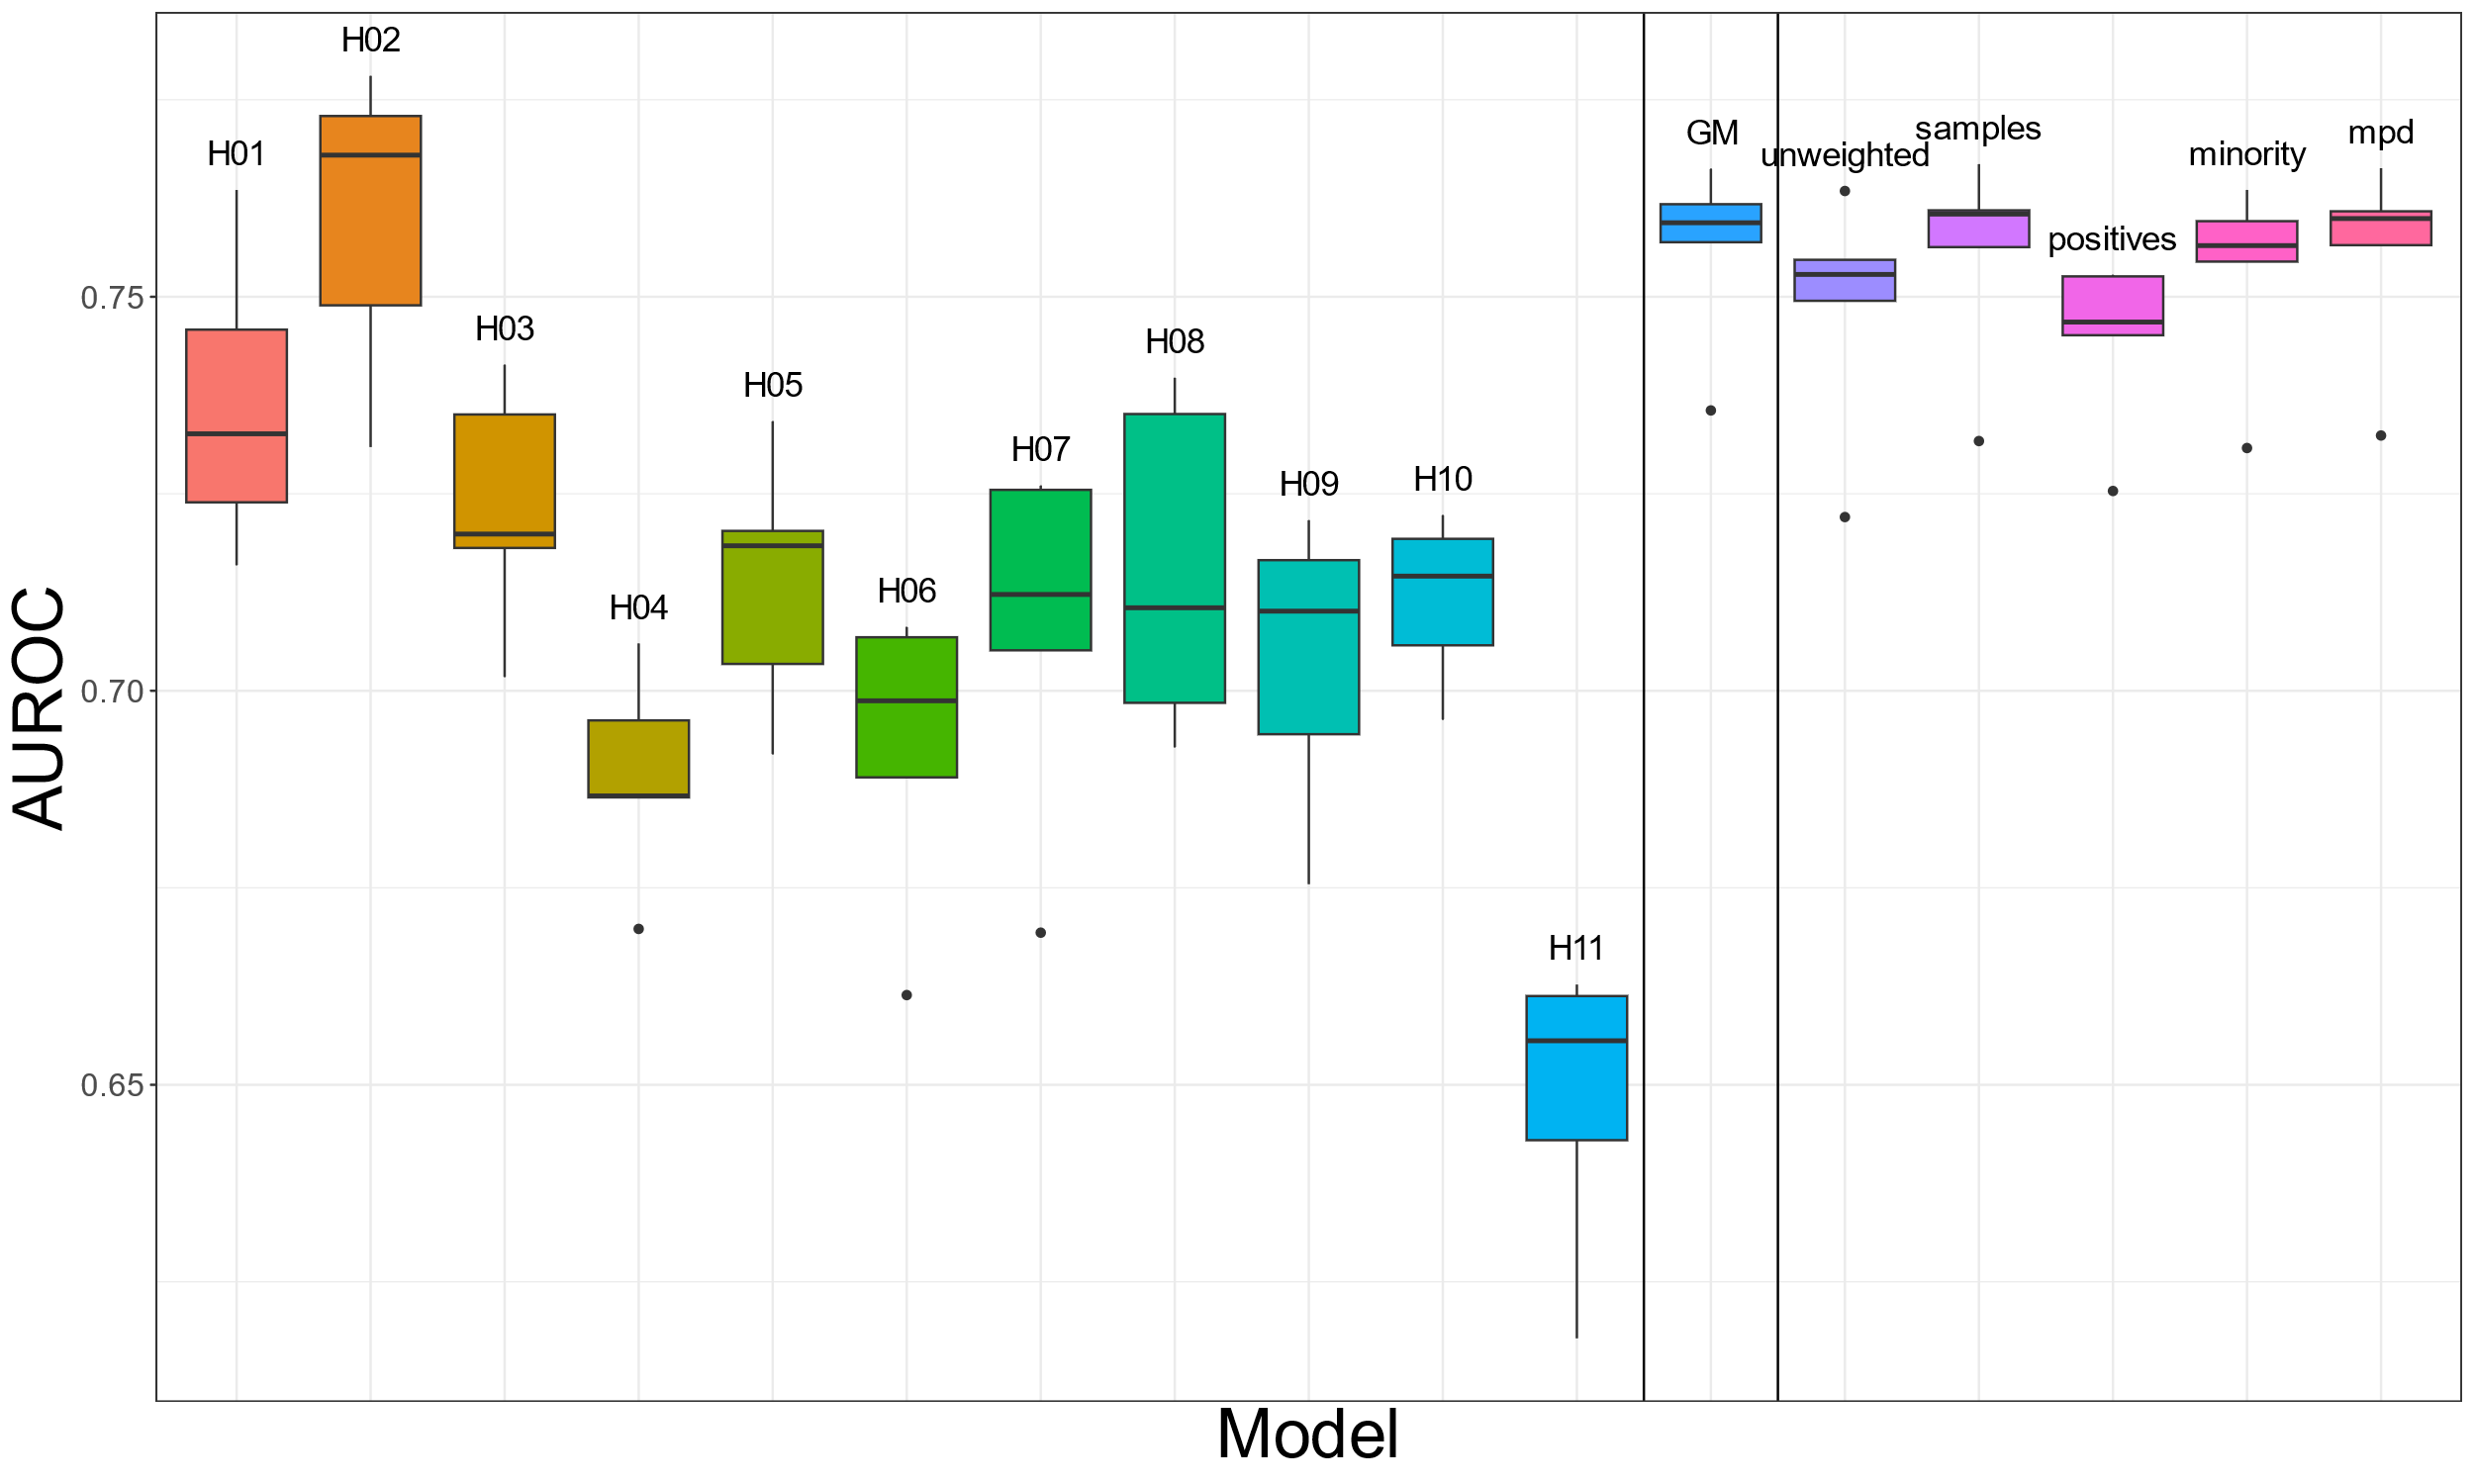


Supplementary figure S2 Models were tested using test data from Hospital H02


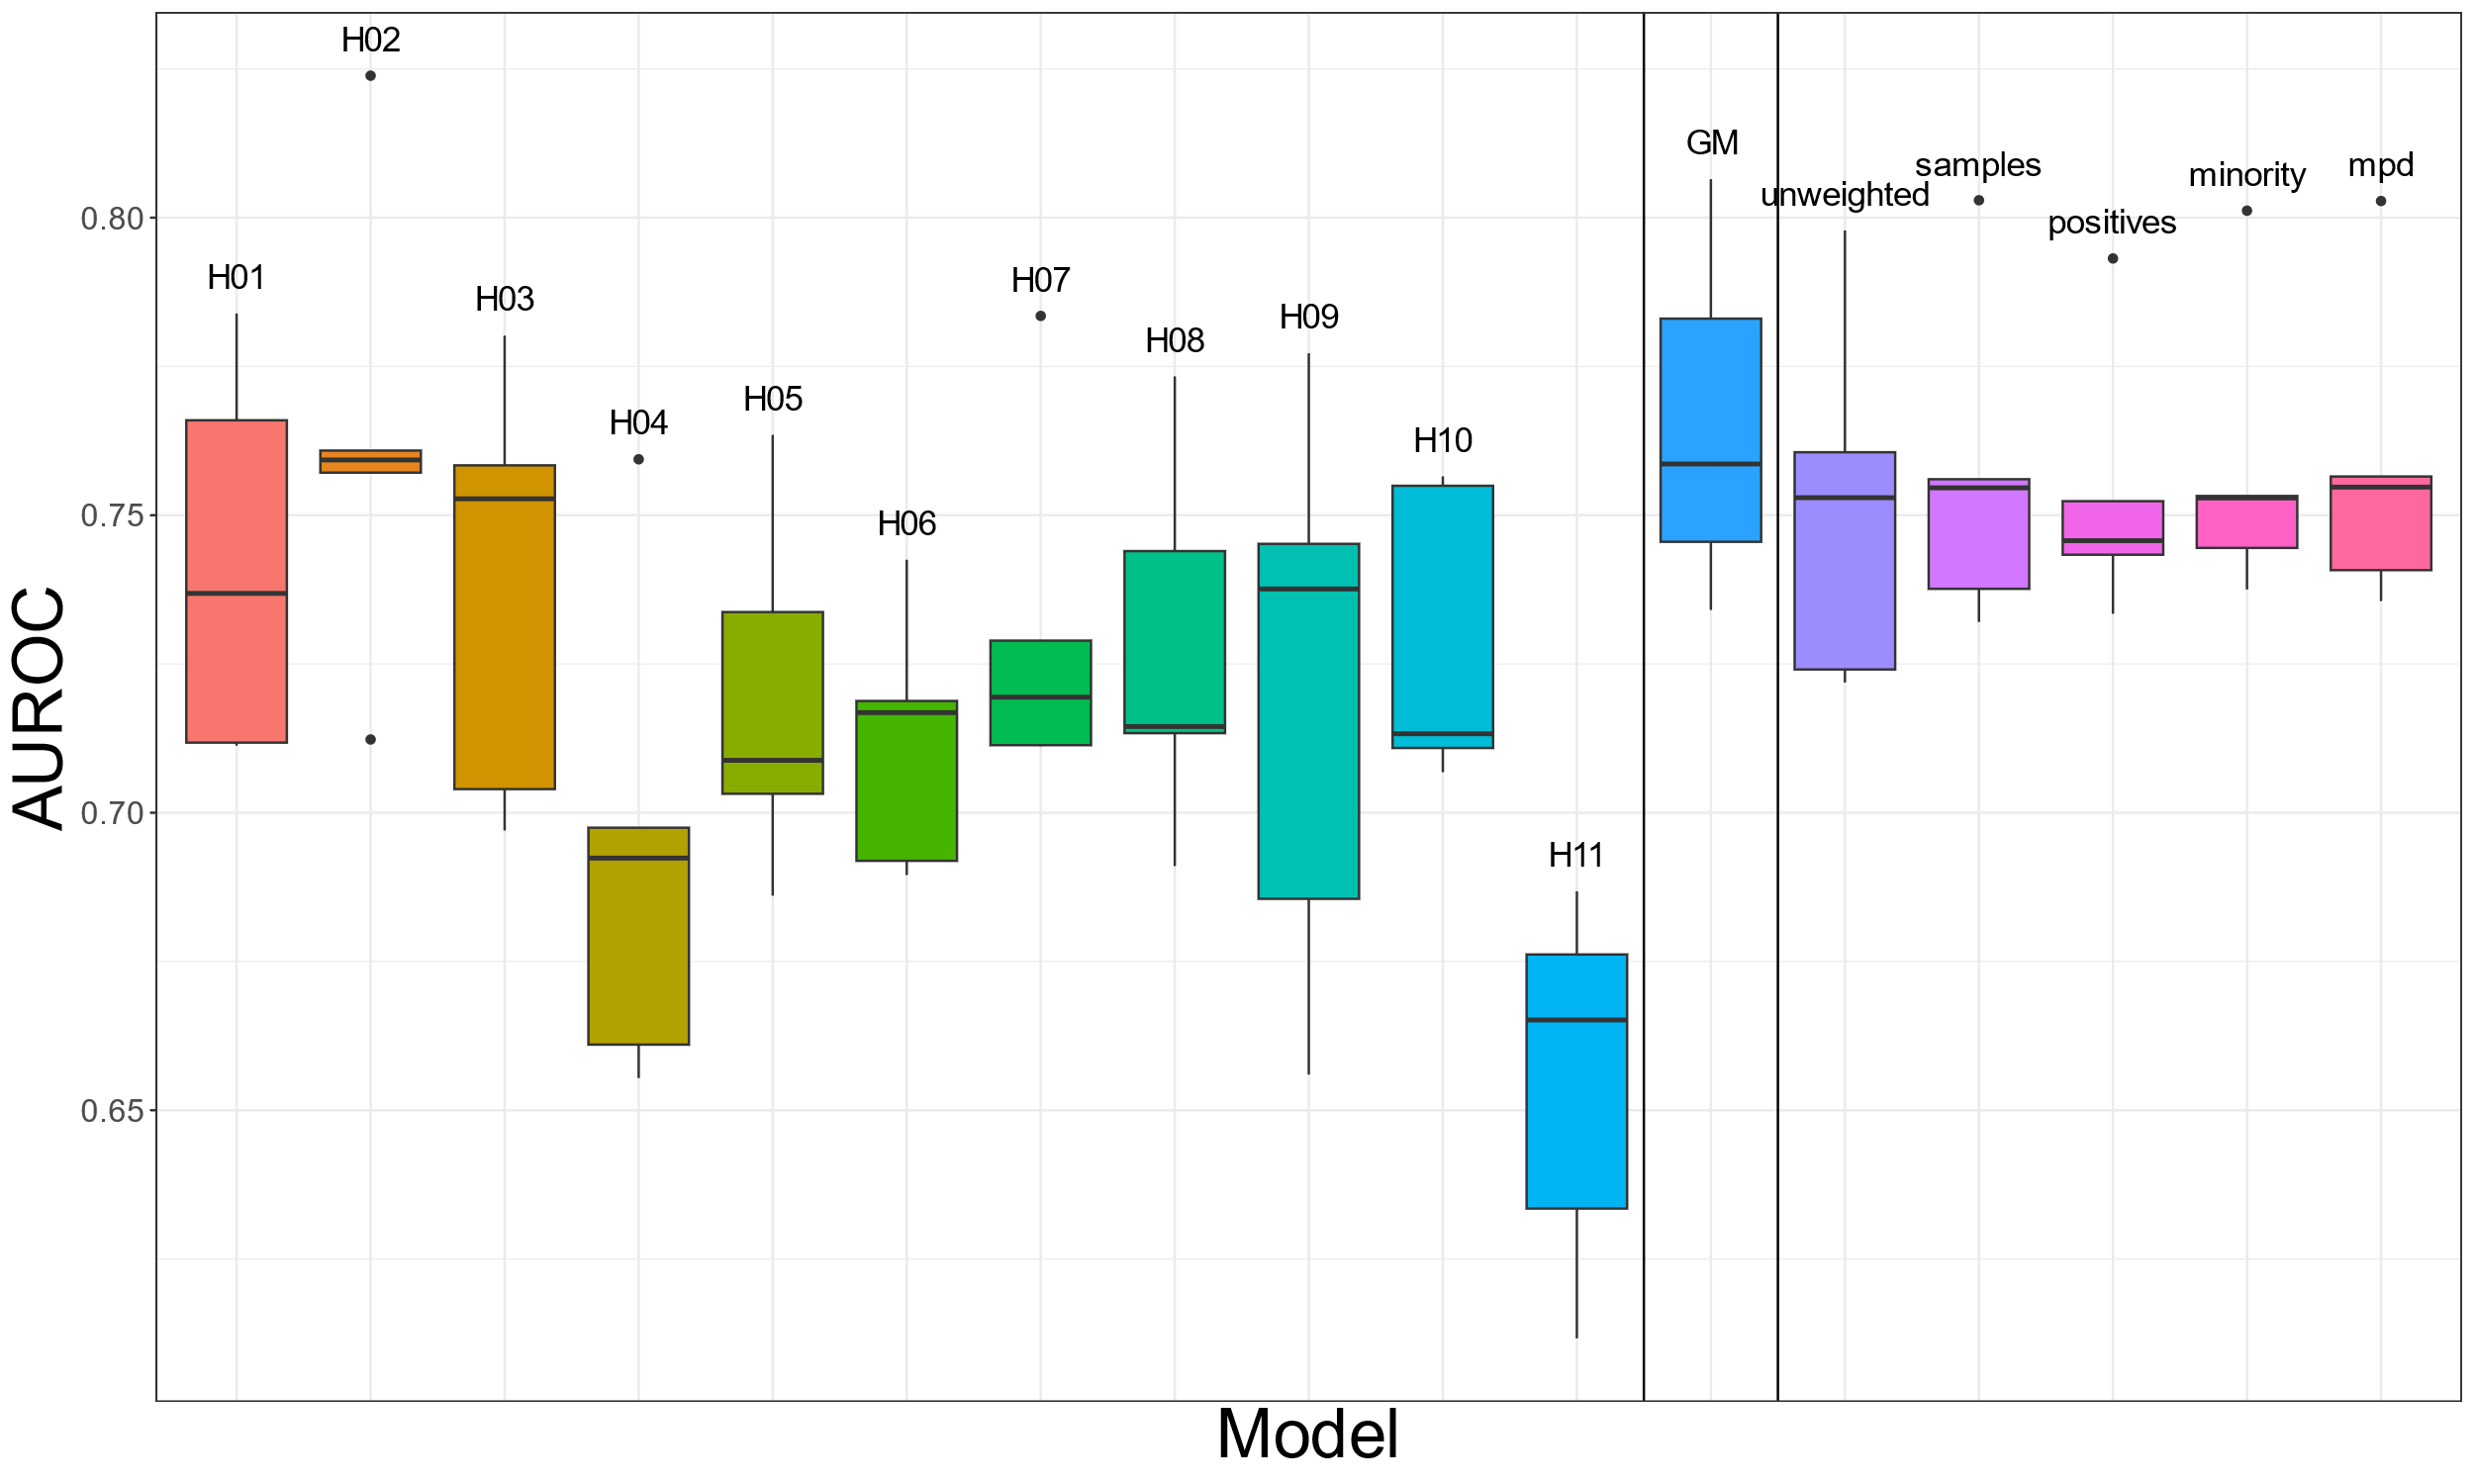


Supplementary figure S3 Models were tested using test data from Hospital H03


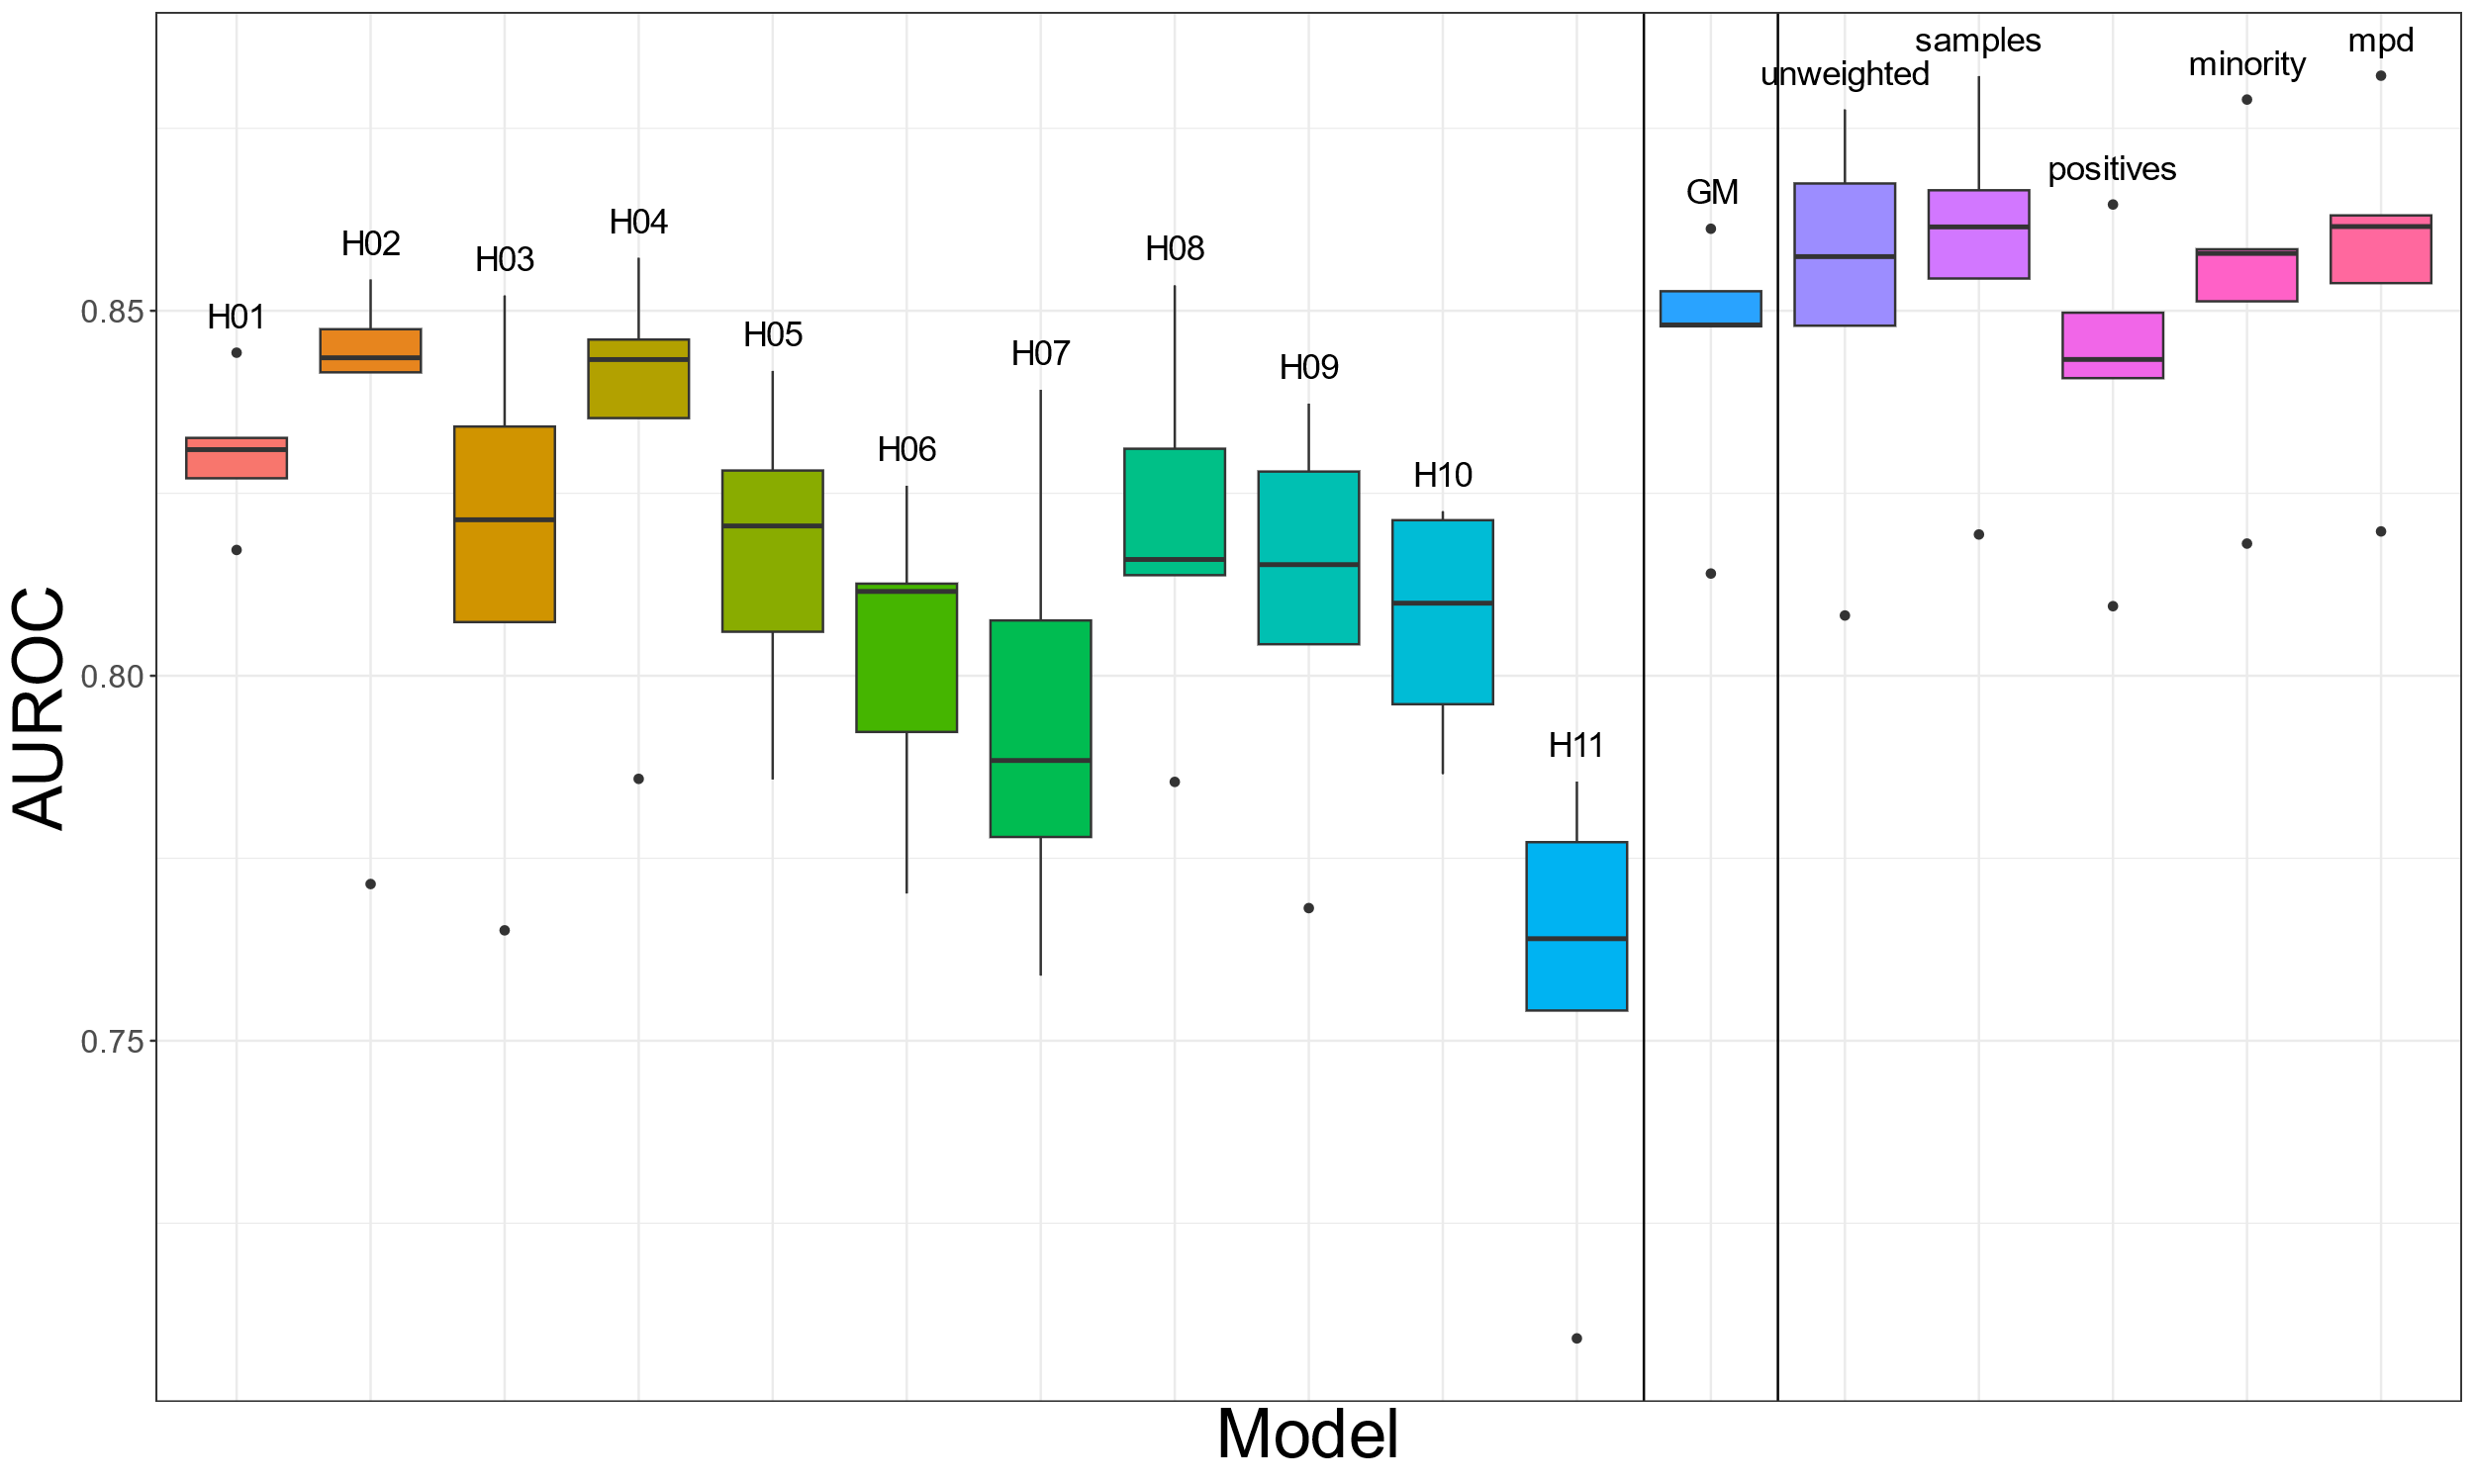


Supplementary figure S4 Models were tested using test data from Hospital H04


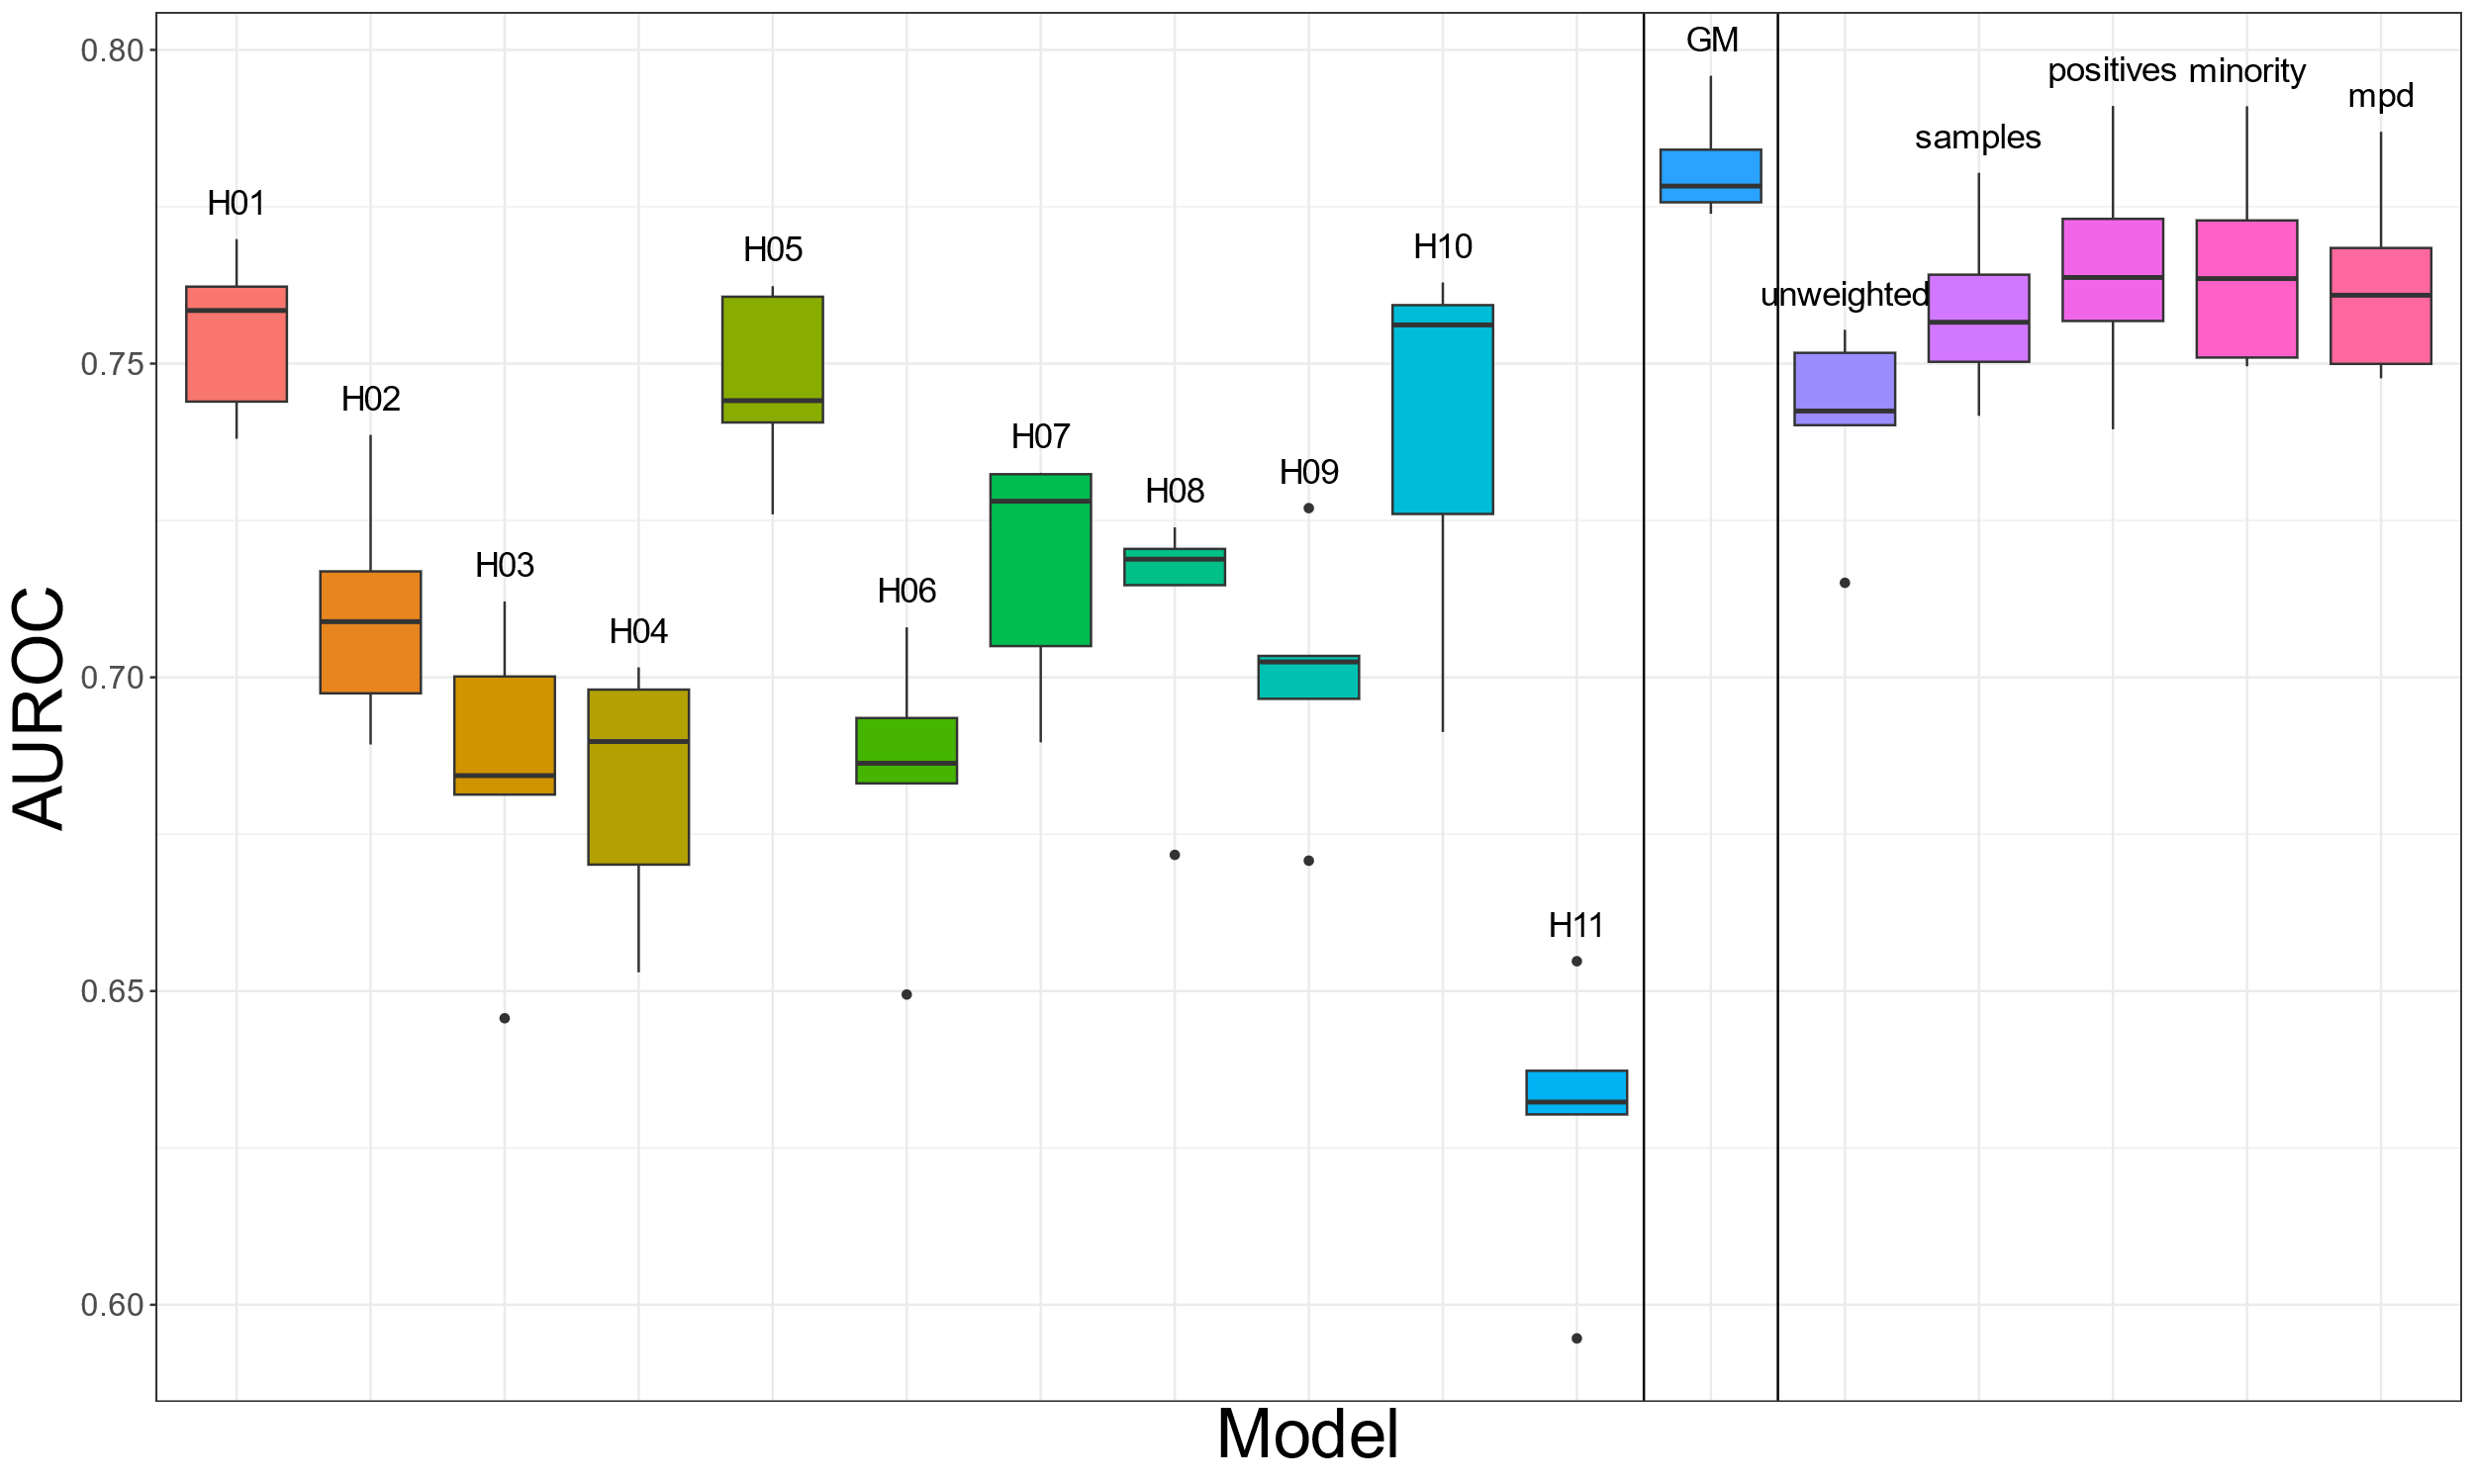


Supplementary figure S5 Models were tested using test data from Hospital H05


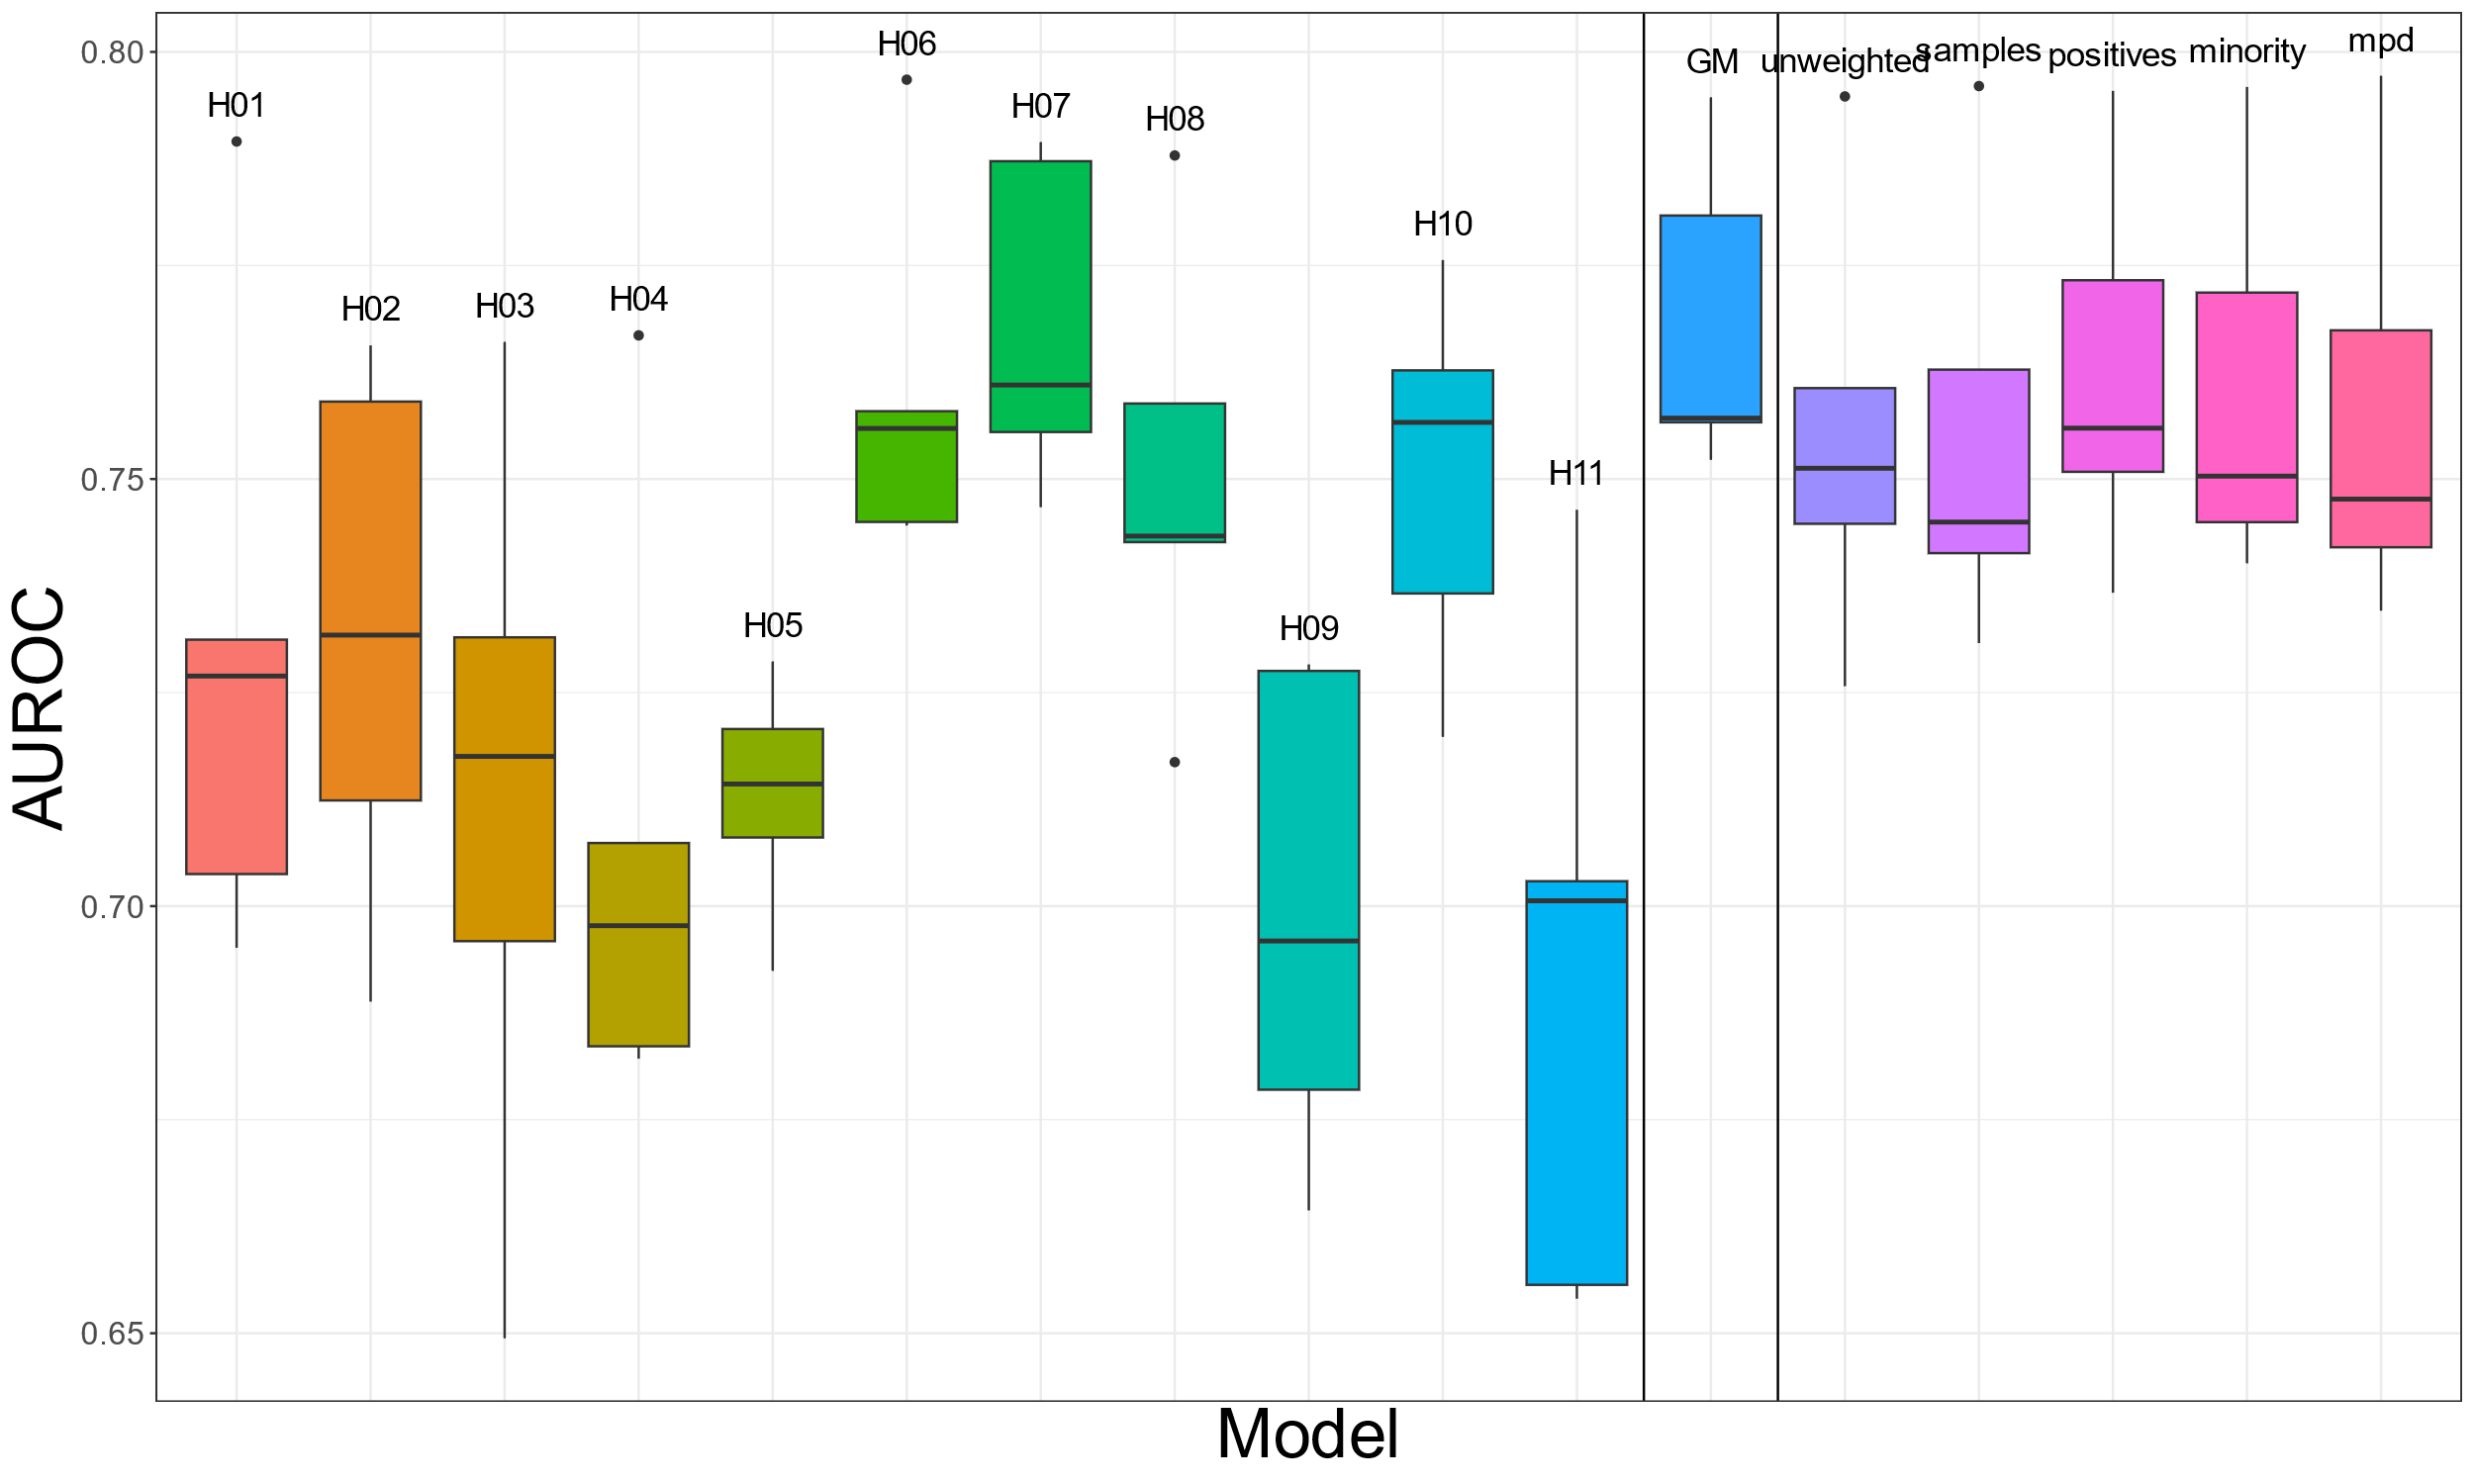


Supplementary figure S6 Models were tested using test data from Hospital H06


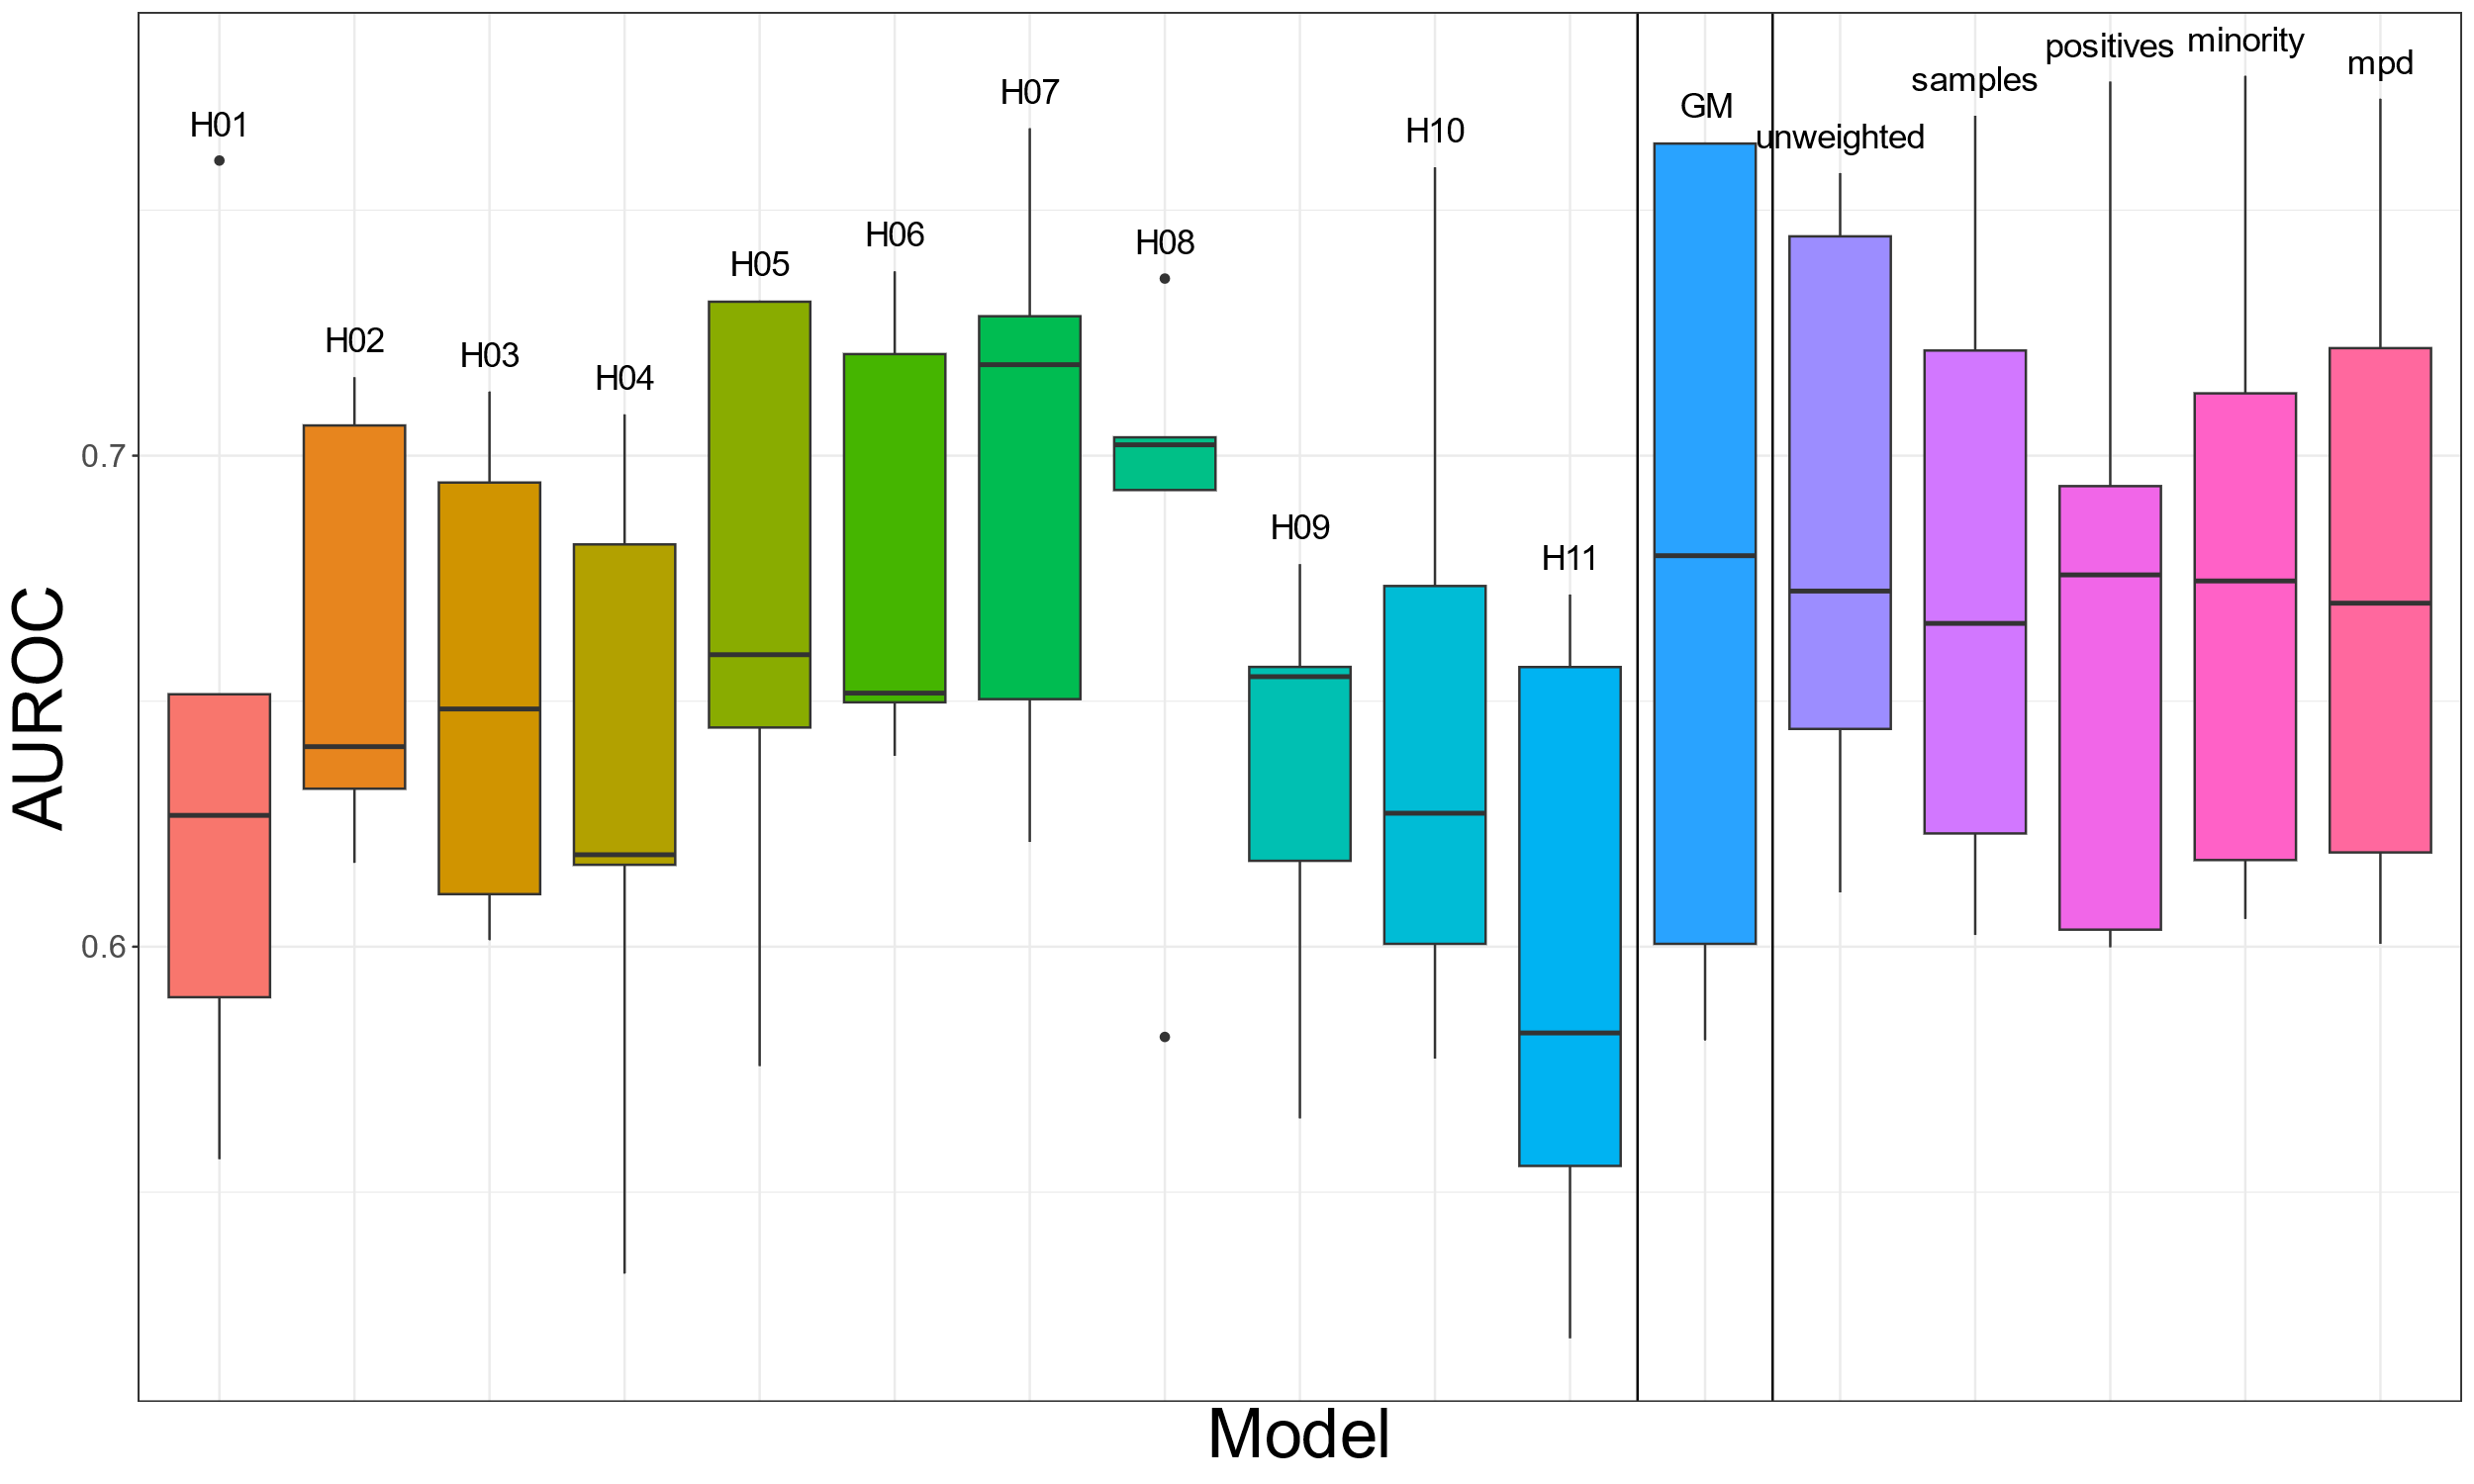


Supplementary figure S7 Models were tested using test data from Hospital H07


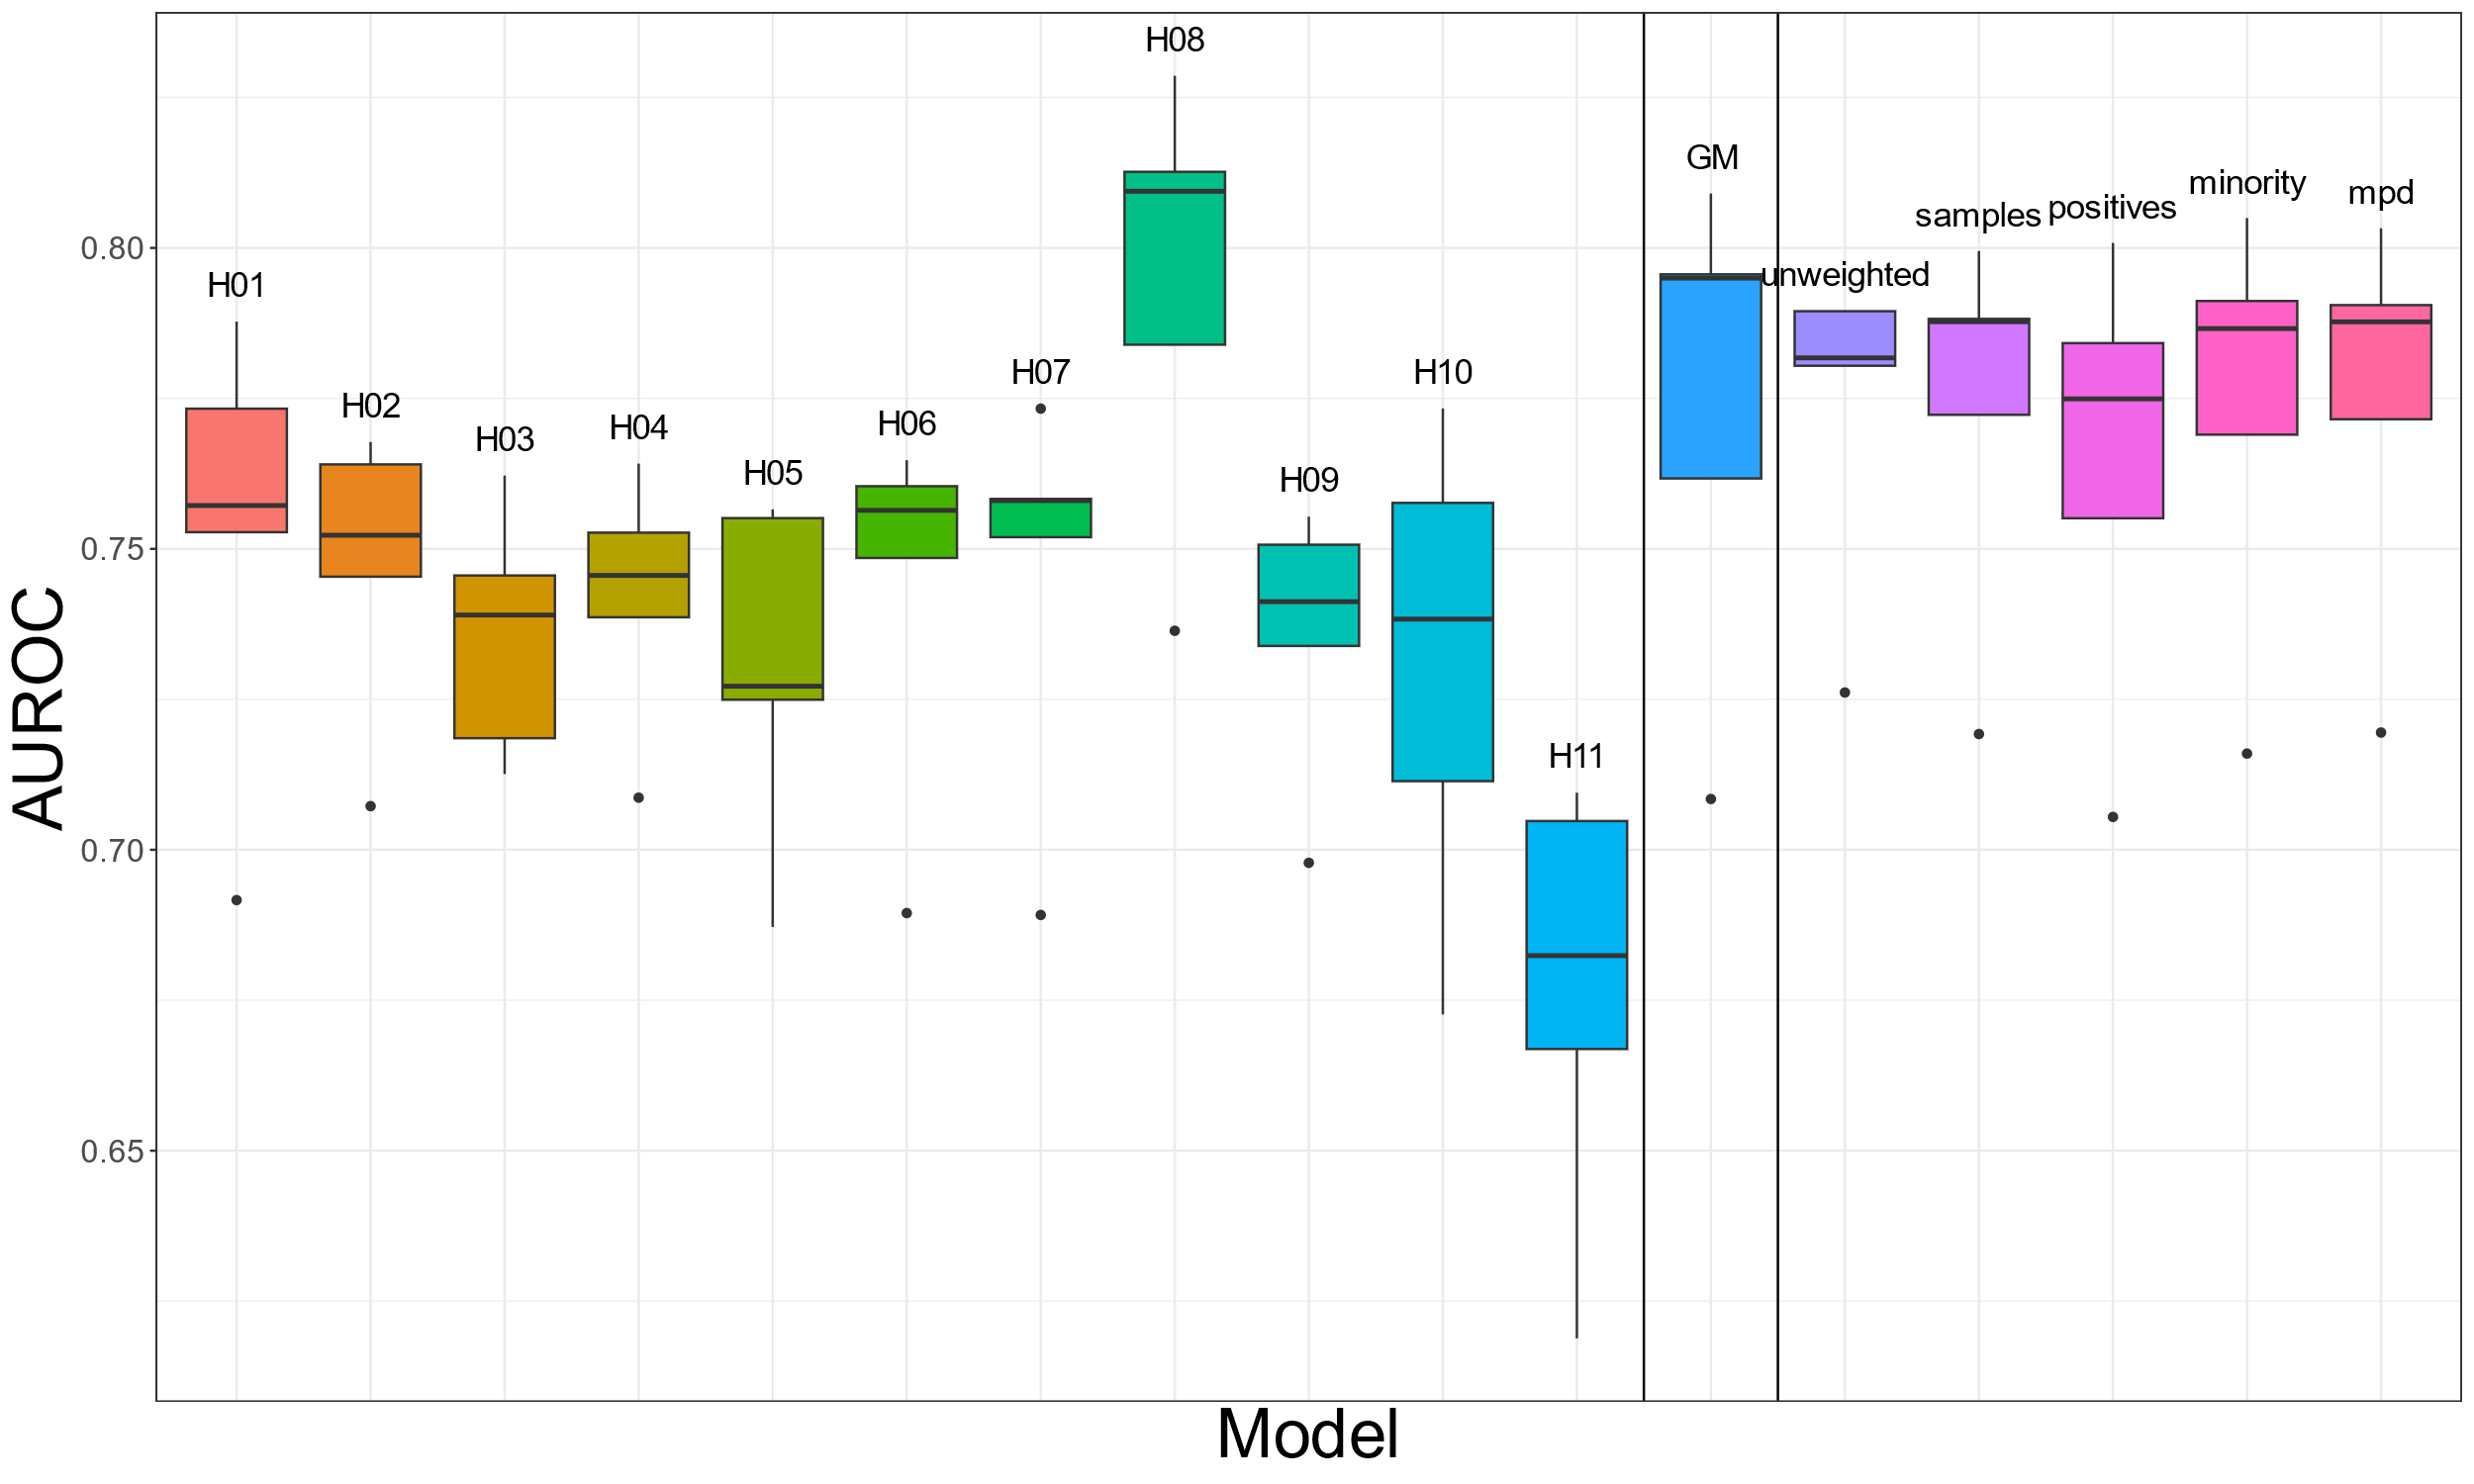


Supplementary figure S8 Models were tested using test data from Hospital H08


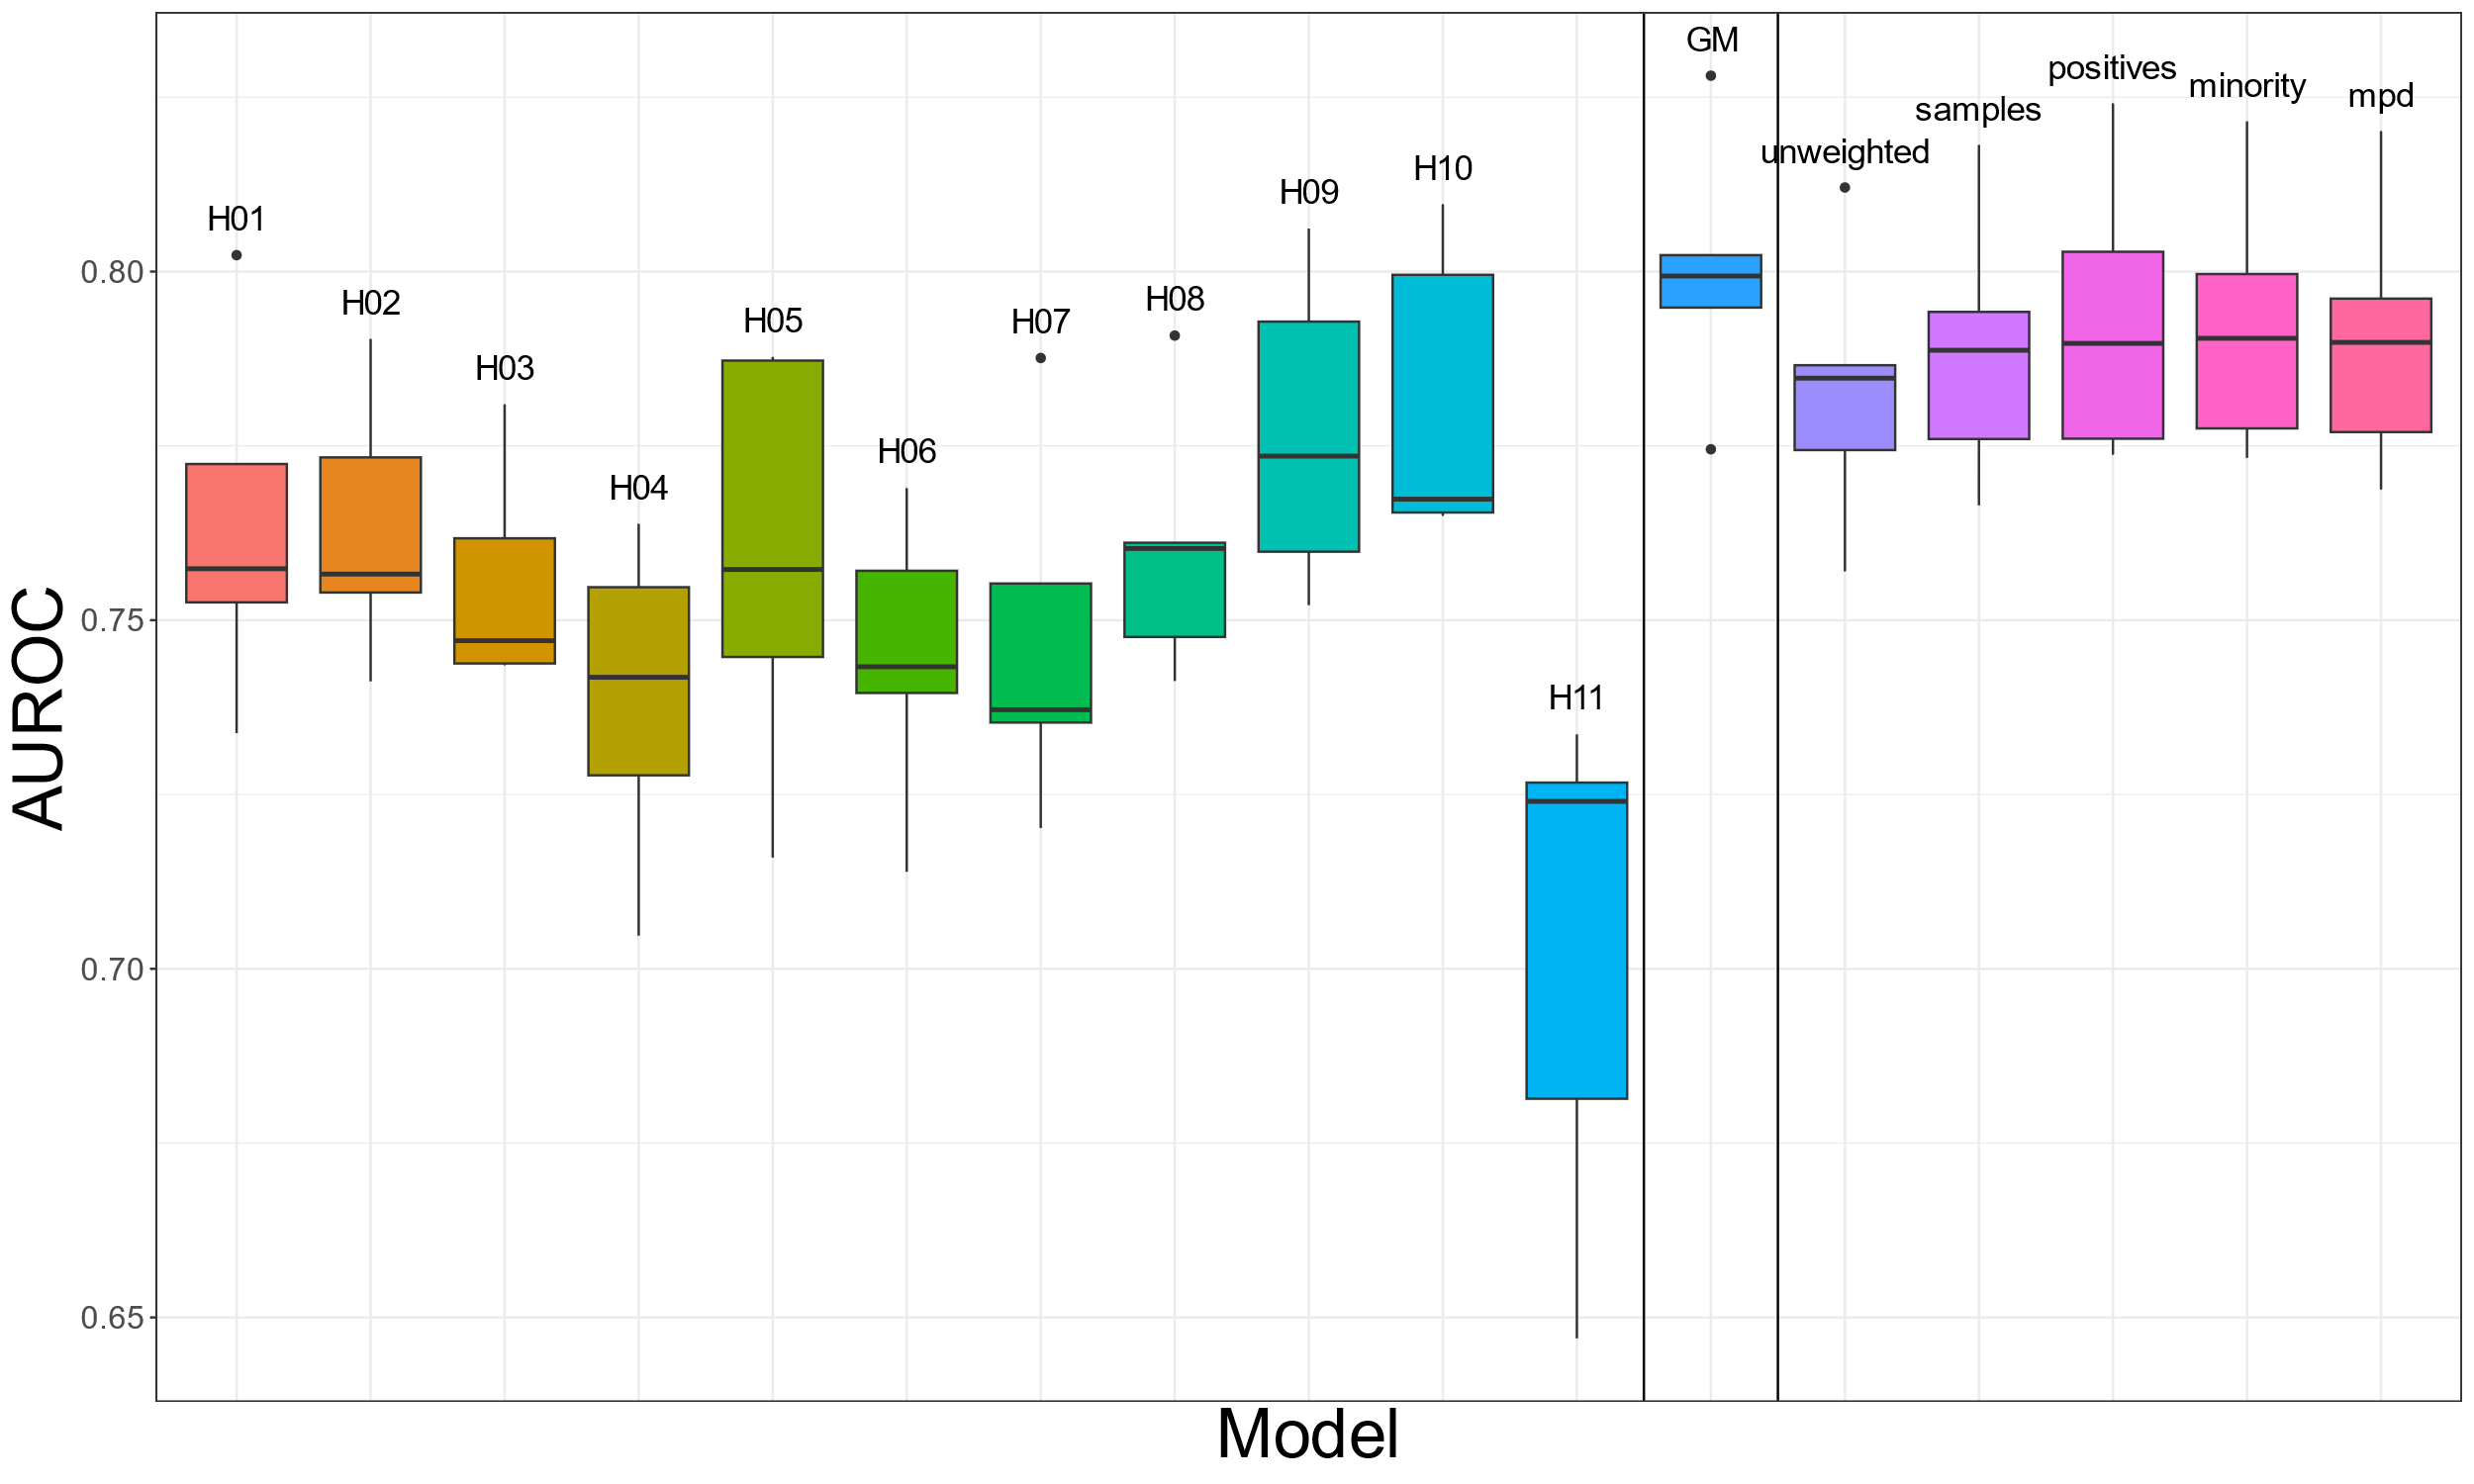


Supplementary figure S9 Models were tested using test data from Hospital H09


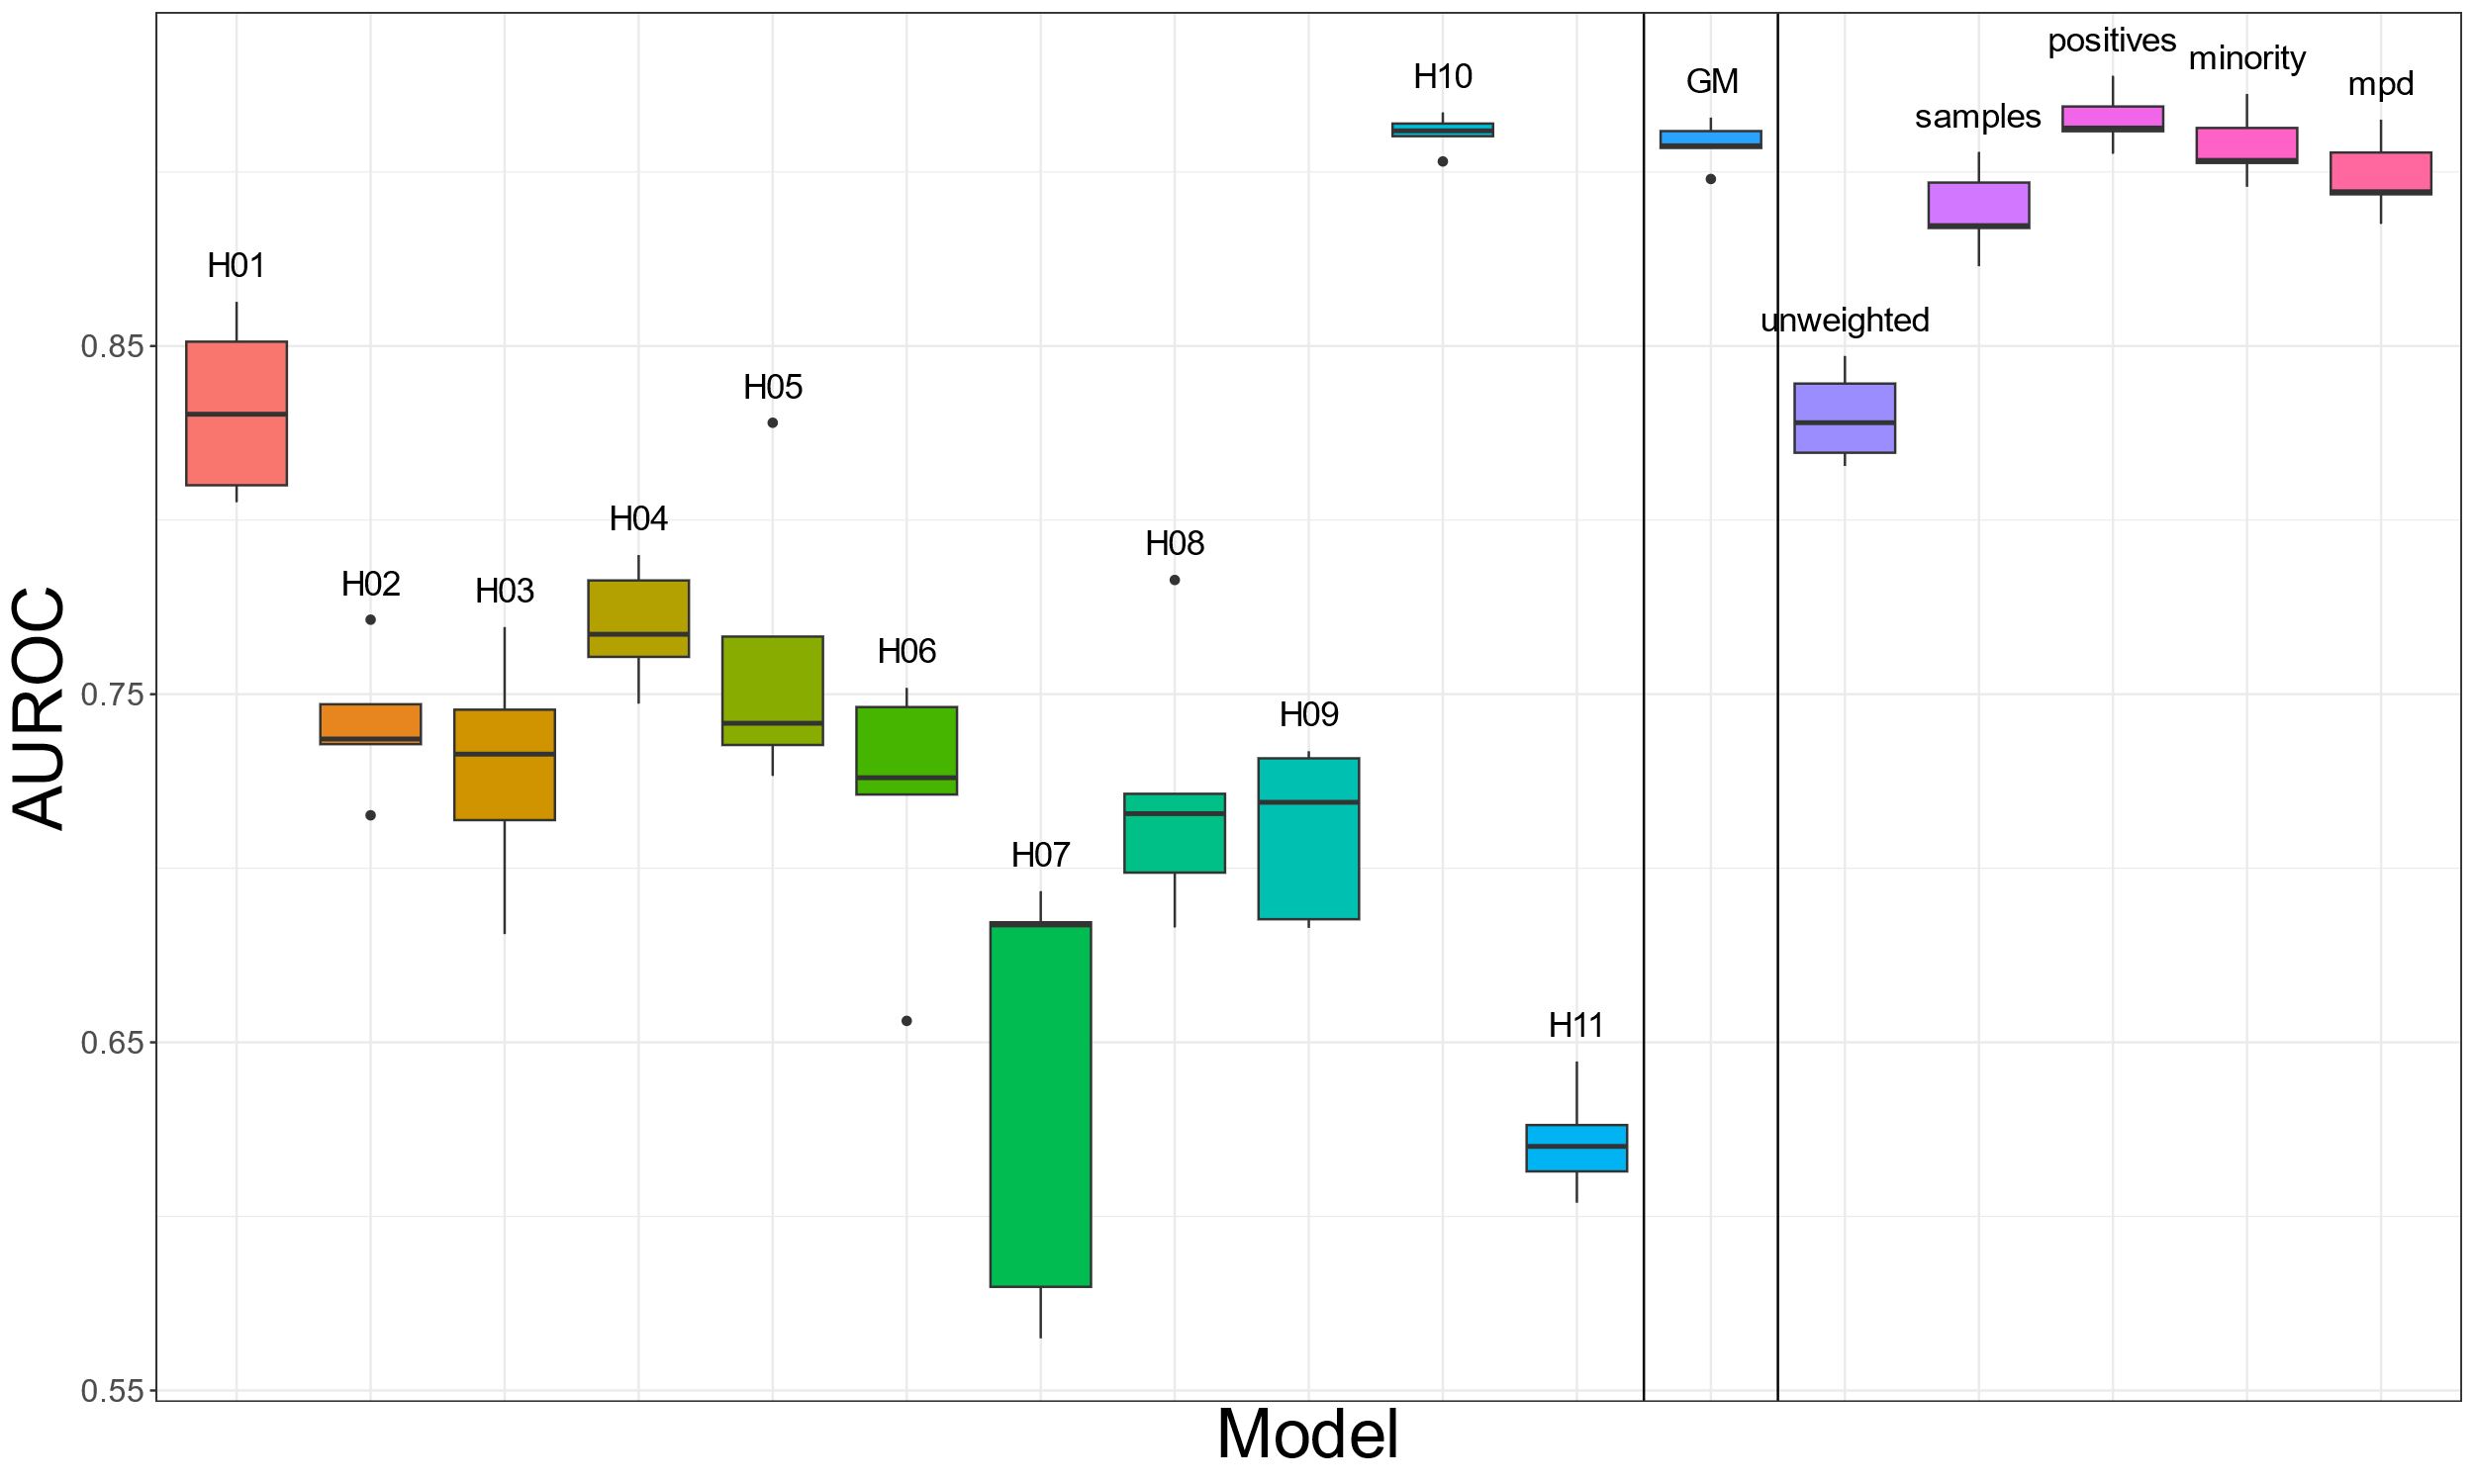


Supplementary figure S10 Models were tested using test data from Hospital H10


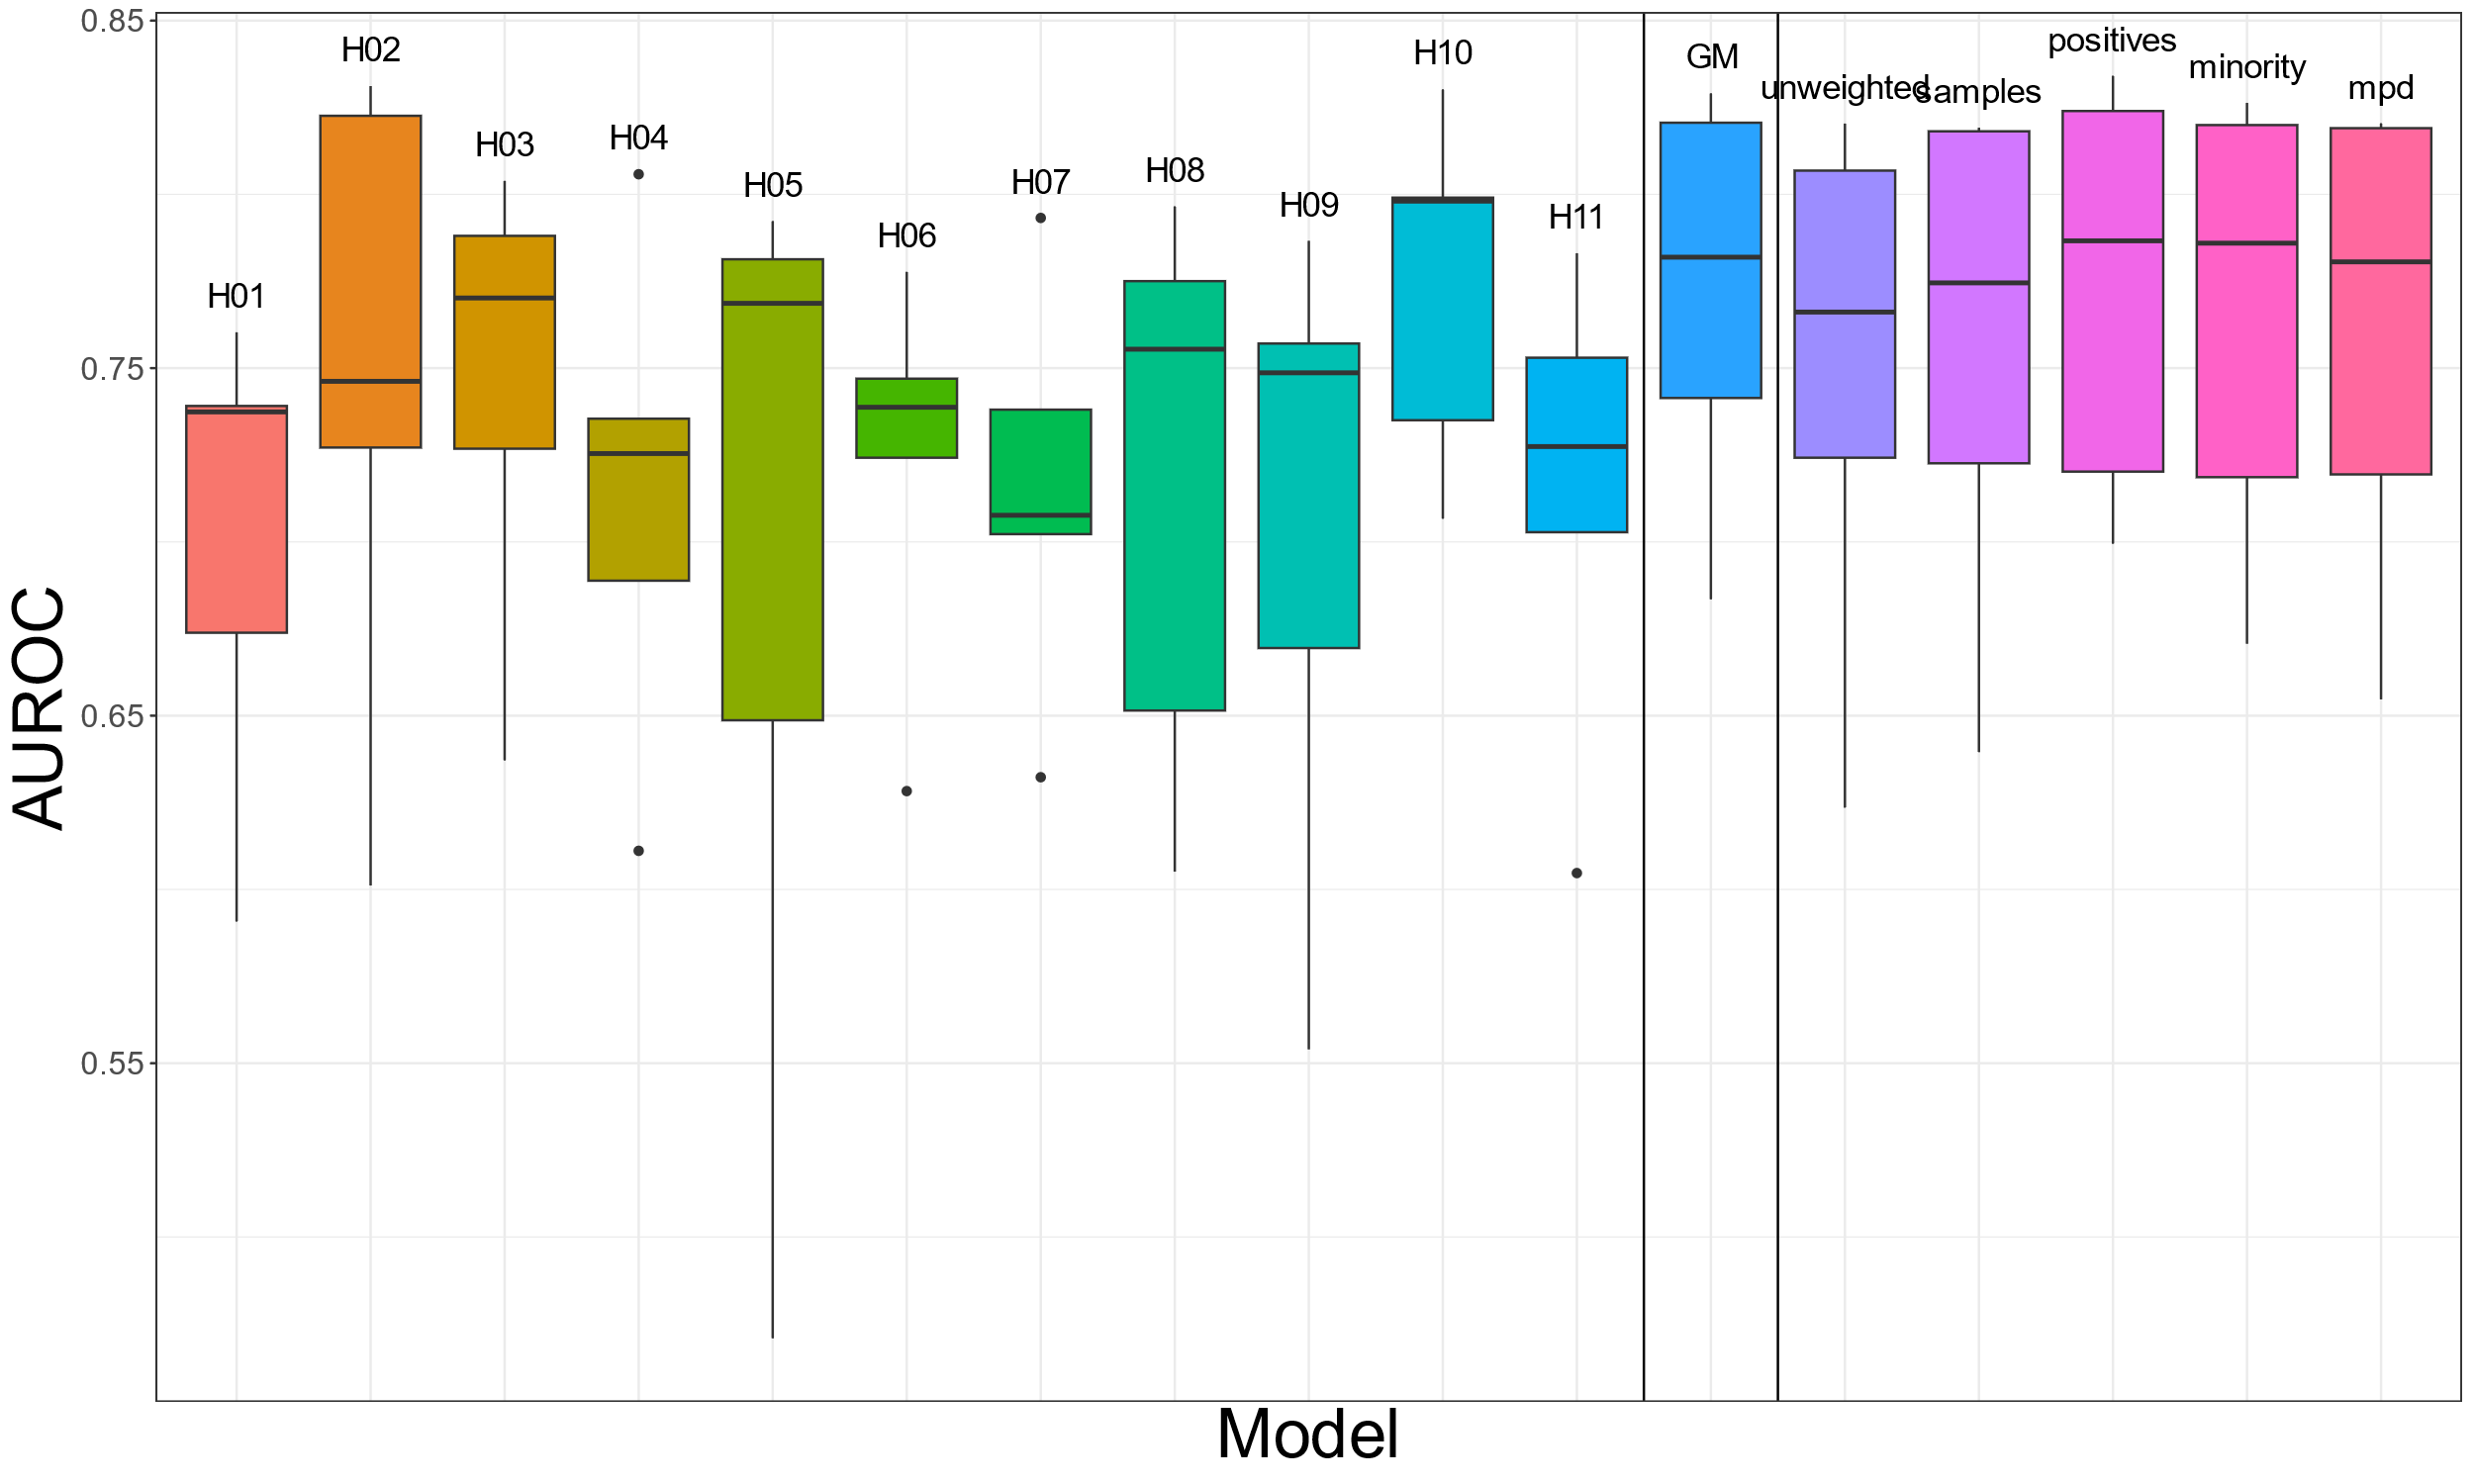


Supplementary figure S11 Models were tested using test data from Hospital H11


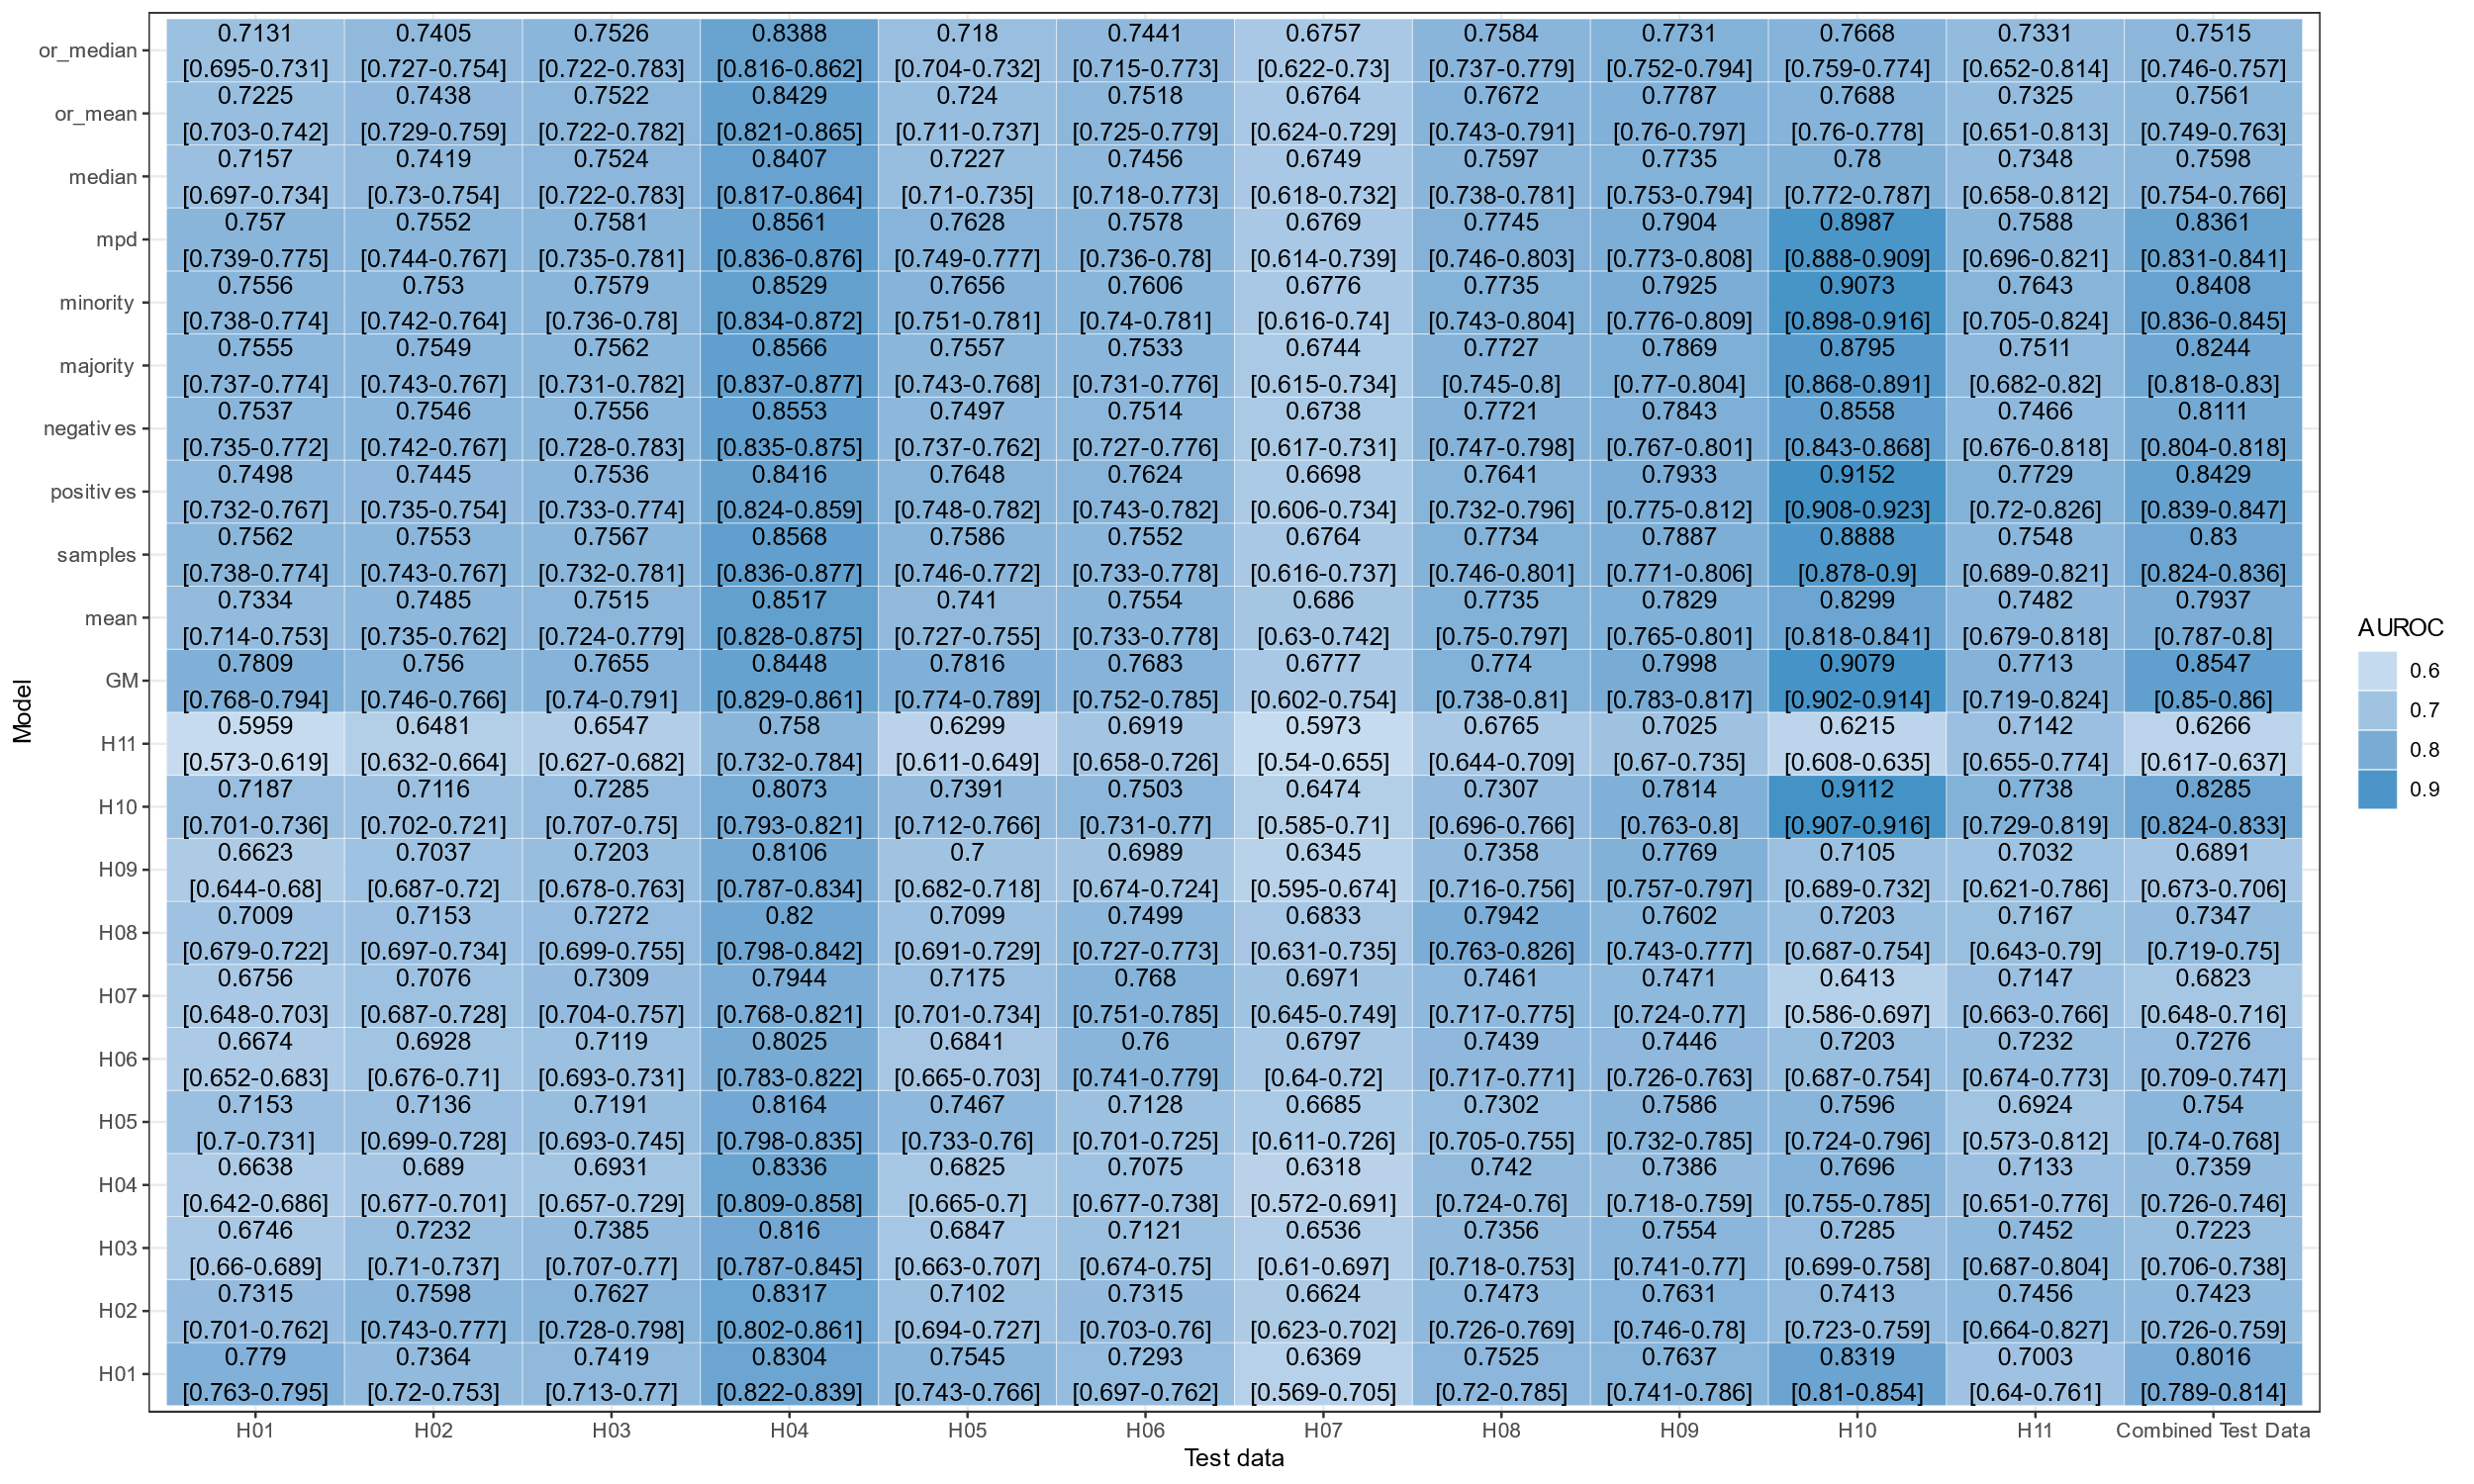


Supplementary fig S 12 Health map showing the Area Under Receiver Operation Characteristics (AUROC) along with 95% confidence interval. The performance of the hospital [H01-H10] models, general model [GM], federated learning weighted average models (unweighted (mean), samples, positives, negatives, majority, minority, mpd, median, mean after outlier removal and median after outlier removal) when tested with test data from individual hospital as well as the combined test dataset. Y-axis represents the models and X-axis represents test data.
